1 **Title: Measles-based Zika vaccine induces long-term immunity and requires**  
2 **NS1 antibodies to protect the female reproductive tract in the mouse model of**  
3 **ZIKA.**

4 **Authors:** Drishya Kurup<sup>1</sup>, Christoph Wirblich<sup>1</sup>, Matthias J. Schnell<sup>1, 2\*</sup>

5 **Affiliations:**

6 <sup>1</sup> Department of Microbiology and Immunology, Sidney Kimmel Medical College at Thomas  
7 Jefferson University, Philadelphia, Pennsylvania-19107.

8 <sup>2</sup> Jefferson Vaccine Center, Sidney Kimmel Medical College, Thomas Jefferson University,  
9 Philadelphia, Pennsylvania-19107.

10 \* Corresponding author. Email: [Matthias.Schnell@jefferson.edu](mailto:Matthias.Schnell@jefferson.edu)

11 **Abstract**

12 Zika virus (ZIKV) can cause devastating effects in the unborn fetus of pregnant women. To  
13 develop a candidate vaccine that can protect human fetuses, we generated a panel of live measles  
14 vaccine (MV) vectors expressing ZIKV-E and -NS1. Our MV-based ZIKV-E vaccine, MV-E2,  
15 protected mice from the non-lethal Zika Asian strain (PRVABC59) and the lethal African strain  
16 (MR766) challenge. Despite 100% survival of the MV-E2 mice, however, complete viral  
17 clearance was not achieved in the brain and reproductive tract of the lethally challenged mice.  
18 We then tested a combination of two MV-based vaccines, the MV-E2 and a vaccine expressing  
19 NS1 (MV-NS1[2]), and we observed durable plasma cell responses, complete clearance of ZIKV  
20 from the female reproductive tract, and complete fetal protection in the lethal African challenge  
21 model. Our findings suggest that NS1 antibodies are required to enhance the protection achieved  
22 by ZIKV-E antibodies in the female reproductive tract.

## 23 **Introduction**

24 Zika virus (ZIKV), an emerging mosquito-borne pathogen, in most healthy adults causes only  
25 mild infection, but in rare cases, causes Guillain-Barré syndrome (GBS) in adults and congenital  
26 Zika syndrome (CZS) in infants born to ZIKV-infected mothers (1). ZIKV is primarily  
27 transmitted by mosquitoes of the *Aedes* genus, but can also be transmitted through congenital,  
28 perinatal, blood transfusion, and sexual routes (2). Before the 2007 ZIKV outbreak in the Yap  
29 Islands, only 14 human cases were reported worldwide (WHO, Accessed November 12, 2019).  
30 Since then, outbreaks have occurred in the Pacific islands, South and Central America, and the  
31 Caribbean (WHO, November 12, 2019). These unprecedented outbreaks led to a sudden increase  
32 in human cases with large numbers of symptomatic infections characterized by fever,  
33 conjunctivitis, rash, headache, myalgia, and arthralgia (3). Also, retrospective studies of the  
34 epidemic showed a strong correlation of ZIKV disease with microcephaly and/or other  
35 congenital disabilities in infants and GBS in adults (4). Based on these case studies, WHO  
36 declared ZIKV as a Public Health Emergency of International Concern on Feb 1, 2016 (WHO,  
37 Accessed November 12, 2019).

38  
39 ZIKV belongs to the *Flavivirus* genus of the *Flaviviridae* family. ZIKV contains a single-  
40 stranded positive-sense RNA genome containing a 5' untranslated region (UTR), a single open  
41 reading frame (ORF) encoding a polyprotein, and a 3' UTR. The ORF encodes three structural  
42 proteins (capsid, C; pre-membrane, prM; and envelope, E) and seven nonstructural proteins  
43 (NS1, NS2A, NS2B, NS3, NS4A, NS4B, NS5) (5). The prM protein associates with E to form  
44 heterodimers and is important for the proper folding of E (6). Among the structural proteins, the  
45 E protein is the major virion surface protein, but the M protein is also displayed on the surface of

46 the viral particle. C protein is a major internal protein that is surrounded by the host-derived  
47 spherical lipid bilayer membrane (7). The glycosylated NS1 protein forms a homodimer and  
48 separates into three distinct populations: a large portion localizes to the site of viral RNA  
49 synthesis and is critical for replication; a second minor portion traffics to the plasma membrane  
50 (mNS1, membrane) where it forms a hydrophobic “spike”, which may contribute to its cellular  
51 membrane association; and a third is secreted into the extracellular space as a hexamer (sNS1,  
52 secreted) (8). The sNS1 is secreted in the serum of infected individuals in high concentrations  
53 and is used as a diagnostic biomarker (9). Currently, there are two distinct strains of ZIKV, the  
54 Asian and African, but only one serotype (10). The Asian strain associated with the recent  
55 outbreaks evolved from the first isolated 1947 African strain after sporadic cases of ZIKV in  
56 Africa and Asia (WHO, November 12, 2019).

57

58 ZIKV infection in healthy adults generates virus neutralizing antibodies (VNAs) directed  
59 towards the E protein and antibodies directed towards the NS1 protein. The presence of ZIKV-E  
60 and NS1 antibodies are suggestive of protective immunity in humans (11, 12). While the  
61 protective E protein antibodies are neutralizing and target the virions, the NS1 antibodies are  
62 non-neutralizing and target the infected cells (13). Several candidate vaccines have utilized the  
63 ZIKV ME, prME, and/or NS1 as the immunogen of choice in DNA, RNA, viral vectors, live  
64 attenuated vaccine (LAV), inactivated virus, and subunit vaccine platforms (13-16). Some of  
65 these vaccines have proceeded to Phase I/II clinical trials that demonstrated safety and  
66 immunogenicity (17-23). When these vaccine platforms were tested in non-pregnant mice and  
67 monkeys, they achieved systemic viral clearance, however, the vaccines tested in pregnant  
68 mouse and monkey models achieved incomplete fetal protection (24, 25). Recently, the RhAd52-



69 and Ad26-based ZIKV vaccine tested in pregnant *IFN $\alpha$  $\beta$ R<sup>-/-</sup>* mice were more successful: just  
70 marginal levels of ZIKV RNA were detected in the placenta and fetal brains (26).

71

72 Each of these vaccine platforms has its advantages and shortcomings. The DNA, RNA, VLP, and  
73 subunit vaccine are likely safe platforms that require multiple doses, but the longevity of the  
74 vaccine-induced immune responses in humans is unknown. Viral vectors, like modified vaccinia  
75 virus Ankara (MVA) and vesicular stomatitis virus (VSV), induce durable responses but have  
76 safety implications when administered to children < 1 year of age, pregnant women, and the  
77 immunocompromised (27, 28). While protective parameters are yet to be established for ZIKV,  
78 the development of a certain threshold of neutralizing E protein antibodies is considered  
79 protective for other flaviviruses, such as yellow fever (YF), tick-borne encephalitis virus  
80 (TBEV), and Japanese encephalitis virus (JEV). But ZIKV, unlike other flaviviruses, can cause  
81 devastating effects in pregnant women, resulting in prolonged viremia leading to CZS in their  
82 infants (29). Hence a ZIKV vaccine must be able to prevent viremia in pregnant women and their  
83 fetuses.

84

85 In an attempt to safely and effectively overcome the persistence of viremia in pregnant women  
86 and the impact on their fetuses, we developed a ZIKV vaccine based on the measles vaccine  
87 vector. The measles virus (MV) vaccine that has more than 50 years of historical data confirming  
88 its safety and long-term efficacy, by induction of durable neutralizing antibody and T cell-  
89 mediated immunity (30, 31). Children < 1 year of age, pregnant women, and postpartum women  
90 can be MV vaccinated (30, 32, 33). The success of the MV vaccine has led to its development as

91 a vaccine vector for DENV, WNV, HIV, Middle East respiratory syndrome (MERS), and  
92 malaria antigen (30).

93

94 Here, we used the MV vaccine vector (Edmonston B strain) to generate a candidate ZIKV  
95 vaccine that can be included in the childhood vaccination regime. We inserted the codon  
96 optimized (co) ZIKV prME from the Asian PRVABC59 strain into the transcription cassette  
97 before N (position 0) and another between N and P (position 2), generating the MV-E(0) and the  
98 MV-E(2) vaccine, respectively. Both vaccines completely cleared the virus in mice challenged  
99 with the non-lethal ZIKV PRVABC59 (Asian) 2015 strain and dramatically reduced ZIKV RNA  
100 copies when challenged with the lethal highly neurotropic mouse-adapted ZIKV MR766  
101 (African) strain. Second-generation vaccine constructs containing the ZIKV NS1 protein-MV-  
102 NS1(2) were tested singly or in combination with MV-E(2) or by inserting the co ZIKV  
103 prMENS1 between H and L protein (position 6), to allow for enhanced protection using the  
104 lethal mouse-adapted ZIKV African MR766 strain. Our results showed that NS1 antibodies  
105 alone did not protect as the MV-NS1(2) mice succumbed to the lethal Zika African strain  
106 challenge. Interestingly, the combination of MV-NS1(2) and MV-E2 virus provided better  
107 protection than MV-E2 alone, in terms of neutralizing titers and clearing ZIKV RNA in the  
108 female reproductive tract. In addition, fetuses born to pregnant mice vaccinated with the  
109 combination of MV-NS1(2) and MV-E2 vaccines were completely protected from the lethal  
110 ZIKV African strain challenge. Lastly, the combination vaccine also induced ZIKV-E-, ZIKV-  
111 NS1-, and MV-H-specific long-lived and short-lived plasma cell responses. These findings  
112 suggest that further development of this vaccine could lead to an effective pre-exposure Zika  
113 vaccine for children.

114 **Results**

115 *Design, recovery, and characterization of first-generation MV-ZIKV vaccines*

116 Recombinant measles viruses (rMV) have been used as vaccine vectors for different infectious  
117 diseases and can serve as an excellent vaccine platform to generate an early childhood vaccine  
118 for ZIKV. A full-length measles virus cDNA clone (MV-ATS-0) that allows the insertion of  
119 foreign genes upstream of the nucleoprotein gene served as the backbone of our vaccine  
120 constructs. We modified the cDNA clone by the addition of a hammerhead ribozyme before the  
121 leader region. We generated two additional vectors, MV-ATS-2 and MV-ATS-6, that allow the  
122 insertion of foreign genes between the N and P genes and the H and L genes, respectively. We  
123 chose to evaluate multiple vectors because transcription of the measles virus genome occurs  
124 sequentially, which results in a transcription gradient as the polymerase proceeds from one gene  
125 to the next. The point of insertion also affects the replication and spread of the recombinant  
126 viruses. We first inserted the codon-optimized (co) gene of the ZIKV precursor (pr), membrane  
127 (M), and envelope (E) protein (strain PRVABC59 Asian 2015, Supplemental Fig. 1) upstream  
128 (ATS-0) and downstream (ATS-2) of the nucleoprotein gene (Figure 1A). The recombinant  
129 viruses rMV-E0 and rMV-E2 were recovered as described in Materials and Methods and  
130 amplified on VERO cells. Control viruses that express a green fluorescent protein (GFP) at ATS-  
131 0 and a GFP-nanoluciferase fusion gene at ATS-2 were generated in a similar way (Figure 1A).

132

133 Characterization of the rMV-ZIKV viruses was performed by an immunofluorescence assay to  
134 examine ZIKV-E and MV nucleoprotein (N) expression (Fig. 1B). Vero cells infected at a MOI  
135 of 0.1 for three days were permeabilized and stained with antibodies directed against ZIKV-E  
136 and MV-N. Co-expression of MV-N and ZIKV-E was detected for the MV-E0, and MV-E2  
137 viruses with only ZIKV-E expressed in the ZIKV PRVABC59-infected cells. MV-N but not  
138 ZIKV-E was detected in the empty vector rMV infected cells.

139

140 Next, we purified the rMV-ZIKV viruses over a 20% sucrose-cushion and analyzed by SDS-  
141 PAGE (10%). The Sypro-ruby stained gel showed the presence of all six MV structural proteins  
142 in the MV-E0 and MV-E2 viruses migrating at a similar size compared to the empty vectors  
143 rMV, MV-GFP0, and NV-GFP-Nluc2 viruses (Fig. 1C). Western blot analysis of a similar SDS-  
144 PAGE of purified rMV-ZIKV vaccines probed for ZIKV-E showed the absence of ZIKV-E in  
145 the virion (Fig. 1D), indicating that rMV-ZIKV vaccines do not incorporate the ZIKV E protein,  
146 thereby retaining the tropism of the MV vector. Cell lysates obtained from Vero cells infected by  
147 rMV-ZIKV vaccines at a MOI of 5 for 60 hours were analyzed on a western blot. The western  
148 blot probed for ZIKV-E & MV-N confirmed their expression (Fig. 1E) in both the MV-E0 and  
149 MV-E2 viruses, with lower levels of ZIKV-E, expressed by the MV-E0 virus. Similar levels of  
150 the actin control were detected in the western blot of the cell lysates (Fig. 1E).

151

### 152 *Efficacy of MV-ZIKV vaccines using non-lethal ZIKV Asian PRVABC59 strain*

153 The rMV vaccine strain requires both the presence of the human CD46 receptor (hCD46) for its  
154 replication (34) and the lack of the interferon  $\alpha\beta$  receptor (*IFN $\alpha\beta$ R*<sup>-/-</sup>) for its systemic replication  
155 in mice (35). Therefore, rMV vaccines historically have been tested in *hCD46 IFN $\alpha\beta$ R*<sup>-/-</sup>

156 transgenic mice. To initially test the immunogenicity of our new vaccines, two groups consisting  
157 of five female *hCD46 IFN $\alpha$  $\beta$ R<sup>-/-</sup>* mice (10- to 12-weeks old) each were immunized with either  
158 MV-E2 or MV-E0 on day 0 and boosted on day 28 with 10<sup>5</sup> TCID<sub>50</sub> intraperitoneally (i.p.); two  
159 additional groups were mock immunized with PBS at the same time points (Fig. S2A). The mice  
160 were bled on days 0, 28, 35, and 63 and tested for the presence of ZIKV-E and MV-H IgG  
161 antibody by ELISA.

162  
163 After the boost, the MV-E2 vaccinated mice showed significantly higher titers against ZIKV-E  
164 ( $p = 0.002$ ) in comparison to the MV-E0 vaccinated mice (Fig. S2B). By day 63, the MV-E0 and  
165 MV-E2 vaccinated mice had similar ZIKV-E EC<sub>50</sub> IgG titers (Fig. S1B). The MV-H responses  
166 were similar for the MV-E0, and the MV-E2 vaccinated animals for all time points (Fig. S2C).  
167 Since the vaccines showed strong immunogenicity, the mice were challenged with the 10<sup>6</sup> FFU  
168 of non-lethal ZIKV Asian PRVABC59 strain subcutaneously (s.c.) on day 63 to mimic the  
169 natural infection route; they were then humanely euthanized at day 77 (14 days post-challenge).  
170 One PBS group was mock challenged with PBS and served as a control.

171  
172 The MV-E2 and MV-E0 vaccines provide robust protection with undetectable ZIKV RNA in the  
173 blood of vaccinated animals, while the control PBS group had significantly high RNA copies  
174  $\sim 10^4$ -  $10^7$  in the blood on day 7 and 14 post challenge (Fig. S2E). Similar results were observed  
175 in the brain (Fig. S2F) and the reproductive tract (Fig. S2G). The high ZIKV neutralizing titers  
176 seen before the challenge (Fig. S2D) were maintained at the necropsy time point (Fig. S2H) for  
177 both the MV-E2 and the MV-E0 groups.

178

179 ***Efficacy of MV-ZIKV vaccines using lethal mouse-adapted ZIKV African MR766 strain***

180 To test whether the MV-ZIKV vaccines could be efficacious in a lethal mouse challenge model  
181 in both males and females, eight groups of five female (F) or male (M) *hCD46 IFN $\alpha$  $\beta$ R<sup>-/-</sup>* mice  
182 (7- to 8-weeks old) each were immunized with 10<sup>5</sup> TCID<sub>50</sub> i.p. of either MV-E2(F), MV-E2(M),  
183 MV-E0(F), MV-E0(M), MV-GFP0(M), MV-GFP-Nluc2(M), rMV(F), or rMV(M) vaccine, on  
184 day 0 and boosted on day 21 (Fig. 2A). The mice were bled on days 0, 14, 28, 56, and 104 and  
185 tested for the presence of ZIKV-E and MV-H IgG antibody titers.

186  
187 The ZIKV-E immune responses developed as early as day 14 in the MV-E2 group, while for the  
188 MV-E0 group, detectable responses were seen only after the boost on day 28. The MV-E2  
189 vaccinated mice developed significantly higher ZIKV-E-specific antibody titers than the MV-E0  
190 vaccinated animals at all time points. This difference was only observed in younger mice.  
191 Significantly higher ZIKV-E IgG antibody titers were observed in the females than in the males  
192 in both MV-E2 and MV-E0 vaccinated groups (Fig. 2B). The MV-H IgG responses were the  
193 highest in the rMV(F) at all time points, with higher MV-H antibody titers seen in the females  
194 than the males of the empty MV vector group. The MV-E2 group developed significantly higher  
195 MV-H IgG antibody titers than the MV-E0, MV-GFP0, and the MV-GFP-Nluc2, indicating that  
196 the vector immunity was unaffected by the addition of the ZIKV-E into the genome (Fig. 2C).

197  
198 The vaccinated animals were challenged on day 104 with a lethal dose of 10<sup>4</sup> FFU s.c. of the  
199 lethal ZIKV African MR766 strain. All of the MV-E2 and MV-E0 vaccinated male and female  
200 mice survived the challenge, showing no signs of ZIKV disease, while the MV-GFP0(M), MV-  
201 GFP-Nluc2(M), and rMV(F&M) controls succumbed to ZIKV disease by day 7 and were

202 humanely euthanized (Fig. 2E). Significantly lower ZIKV RNA copies were observed in the  
203 blood of the MV-E2 and MV-E0 groups than of the control groups (MV-GFP0, MV-GFP-Nluc2,  
204 and rMV) at all time points, with complete viral clearance from the blood seen in the MV-E0  
205 vaccinated animals by day 15 (Fig. 2F). Similar to the viral load in the blood, significantly lower  
206 ZIKV RNA copies were observed in the brain (Fig. 2G) and the reproductive tract (Fig. 2H) of  
207 the MV-E2 and the MV-E0 vaccinated animals than of the control groups. The MV-E2 and MV-  
208 E0 vaccinated animals developed similar ZIKV neutralizing titers at day 104 and necropsy (Fig.  
209 2D and I).

210

### 211 ***MV-ZIKV vaccines induce long-term immunity and protection***

212 We next assessed the longevity of the immune responses induced by MV-E2 and MV-E0  
213 vaccines. Four groups of five female *hCD46 IFN $\alpha$  $\beta$ R<sup>-/-</sup>* mice (9- to 12-weeks old) were  
214 vaccinated on day 0 and boosted on day 28 with 10<sup>5</sup> TCID<sub>50</sub> i.p. of MV-E2, MV-E0, rMV, or  
215 PBS (Fig. S3A). The MV-E2 and MV-E0 groups had similar ZIKV-E IgG antibody titers by day  
216 110 (Fig. S3B). Similar to the previous experiment, MV-H IgG antibody titers were similar in  
217 the MV-E2-, MV-E0-, and the MV-vector vaccinated animals (Fig. S3C). Of note, MV-E2 and  
218 MV-E0 vaccinated animals survived 10<sup>4</sup> FFU of lethal ZIKV African MR766 strain challenge  
219 (Fig. S3E) with viral clearance in the blood at necropsy (Fig. S3F) and significantly lower ZIKV  
220 RNA copies in the brain (Fig. S3G) and the reproductive tract compared to the control animals  
221 (Fig. S3H). Viral clearance correlated with high ZIKV neutralizing titers on day 144 (Fig. S3D)  
222 and at necropsy (Fig. S3I).

223

### 224 ***MV-E2 vaccine is efficacious when administered intramuscularly***

225 To learn whether the route of immunization is important and whether prior MV immunity  
226 affected the efficacy of the MV-E2 and MV-E0 vaccines, we performed an additional mouse  
227 challenge study. Four groups of five male or female *hCD46 IFN $\alpha\beta$ R*<sup>-/-</sup> mice (9- to 12-weeks old)  
228 were pre-vaccinated (Prevac) on day -35 with 10<sup>5</sup> TCID<sub>50</sub> intramuscularly (i.m.) of rMV. Then,  
229 on day 0, they were vaccinated i.m. with 10<sup>5</sup> TCID<sub>50</sub> of either MV-E2 or MV-E0 vaccines and  
230 boosted on day 21 (Fig. S4A). In addition, on day 0, seven groups of five female or male mice  
231 were vaccinated i.m. with MV-E2, MV-E0, MV, or PBS. The ZIKV-E IgG titers followed a  
232 similar trend to the i.p. MV-E2 and MV-E0 vaccinated animals, but lower titers were seen in the  
233 i.m. vaccinated animals (Fig. S4B). For the Prevac groups, MV-E2 vaccinated animals elicited  
234 significantly lower ZIKV-E IgG titers while the MV-E0 vaccinated animals did not seroconvert  
235 throughout the study (Fig. S4B). The MV-H IgG titers were boosted on day 0 and 21 in the  
236 Prevac groups, which indicated successful vaccination. The Prevac groups developed similar  
237 MV-H antibody responses by day 56 to the MV-E2, MV-E0, and rMV groups. All the animals  
238 were challenged on day 63 with 10<sup>4</sup> FFU of lethal ZIKV African MR766 strain. All of the MV-  
239 E2 vaccinated animals survived the challenge. In contrast, the animal with the lowest ZIKV  
240 neutralizing titer (Fig. S4D) in the MV-E0 group succumbed to challenge, confirming that a  
241 certain threshold of neutralizing titer determines protection (Fig. S4E). All of the mice in the  
242 Prevac groups succumbed to ZIKV disease on day 9, while controls succumbed on day 7. The  
243 Prevac groups and the control groups showed significantly higher ZIKV RNA in the blood,  
244 brain, and the reproductive tract than the MV-E0 and MV-E2 vaccinated animals (Fig. S4F-H).  
245 The findings of this study confirm that MV-E2 vaccine is efficacious irrespective of the route of  
246 immunization (Fig. 3, S2-S4), and that prior MV immunity affects the efficacy of the MV-E2  
247 and MV-E0 vaccines.



248

249 ***Rationale, design, and characterization of second-generation MV-ZIKV vaccines***

250 While the MV-E2 vaccine was efficacious when administered i.p. or i.m., it did not completely  
251 protect the brain and the reproductive tract of vaccinated animals when challenged with the  
252 mouse-adapted ZIKV African MR766 strain. ZIKV NS1 is expressed on the surface of infected  
253 cells, and previous research by others has shown that antibodies directed towards NS1 are  
254 protective via antibody-dependent cellular cytotoxicity (ADCC) or antibody-dependent cellular  
255 phagocytosis (ADCP) (13). We, therefore, generated MV-NS1(2) that expressed ZIKV NS1  
256 from ATS-2 and swapped the ZIKV signal peptide (SP) with that of the human Ig Kappa signal  
257 peptide to allow for better secretion (Supplemental Fig. S5) (13). Additionally, we generated  
258 constructs that expressed the prME-NS1 (Supplemental Fig. S6) from ATS-2 and ATS-6,  
259 naming them MV-E-NS1(2) and MV-E-NS1(6), respectively, to test whether the NS1 antibodies  
260 enhanced the protection elicited by ZIKV-E antibodies (Fig. 3A). We recovered these second-  
261 generation MV-ZIKV vaccines using the standard methods described in the Materials and  
262 Methods section.

263

264 The recovered second-generation MV-ZIKV viruses were assessed for their expression of ZIKV-  
265 E, ZIKV-NS1, and MV-N by immunofluorescence assay (Fig. 3B). The MV-NS1(2) co-express  
266 MV-N and ZIKV-NS1, while MV-E-NS1(2) and MV-E-NS1(6) express MV-N, ZIKV-E, and  
267 ZIKV-NS1 proteins. The control ZIKV PRVABC59-infected cells stained for ZIKV-E and  
268 ZIKV-NS1 while the empty vector rMV (Edmonston B strain) only stained for MV-N.

269

270 To investigate the influence of the foreign gene on virus production, we assessed multi-step virus  
271 growth kinetics of MV-ZIKV vaccines (Supplemental Fig. S7). Released and cell-associated  
272 viruses were harvested at all time points. The MV-E2 virus showed peak titers similar to the  
273 empty MV vector, while the MV-NS1 yielded slightly lower titers. In contrast, the MV-E0  
274 yielded very low titers. For the single antigen (ZIKV-E or NS1) viruses, peak titers were seen at  
275 120 hpi, while for the dual antigen vaccines, peak titers were seen at 96 hpi. The MV-E-NS1(6)  
276 grew to higher titers than MV-E-NS1(2).

277

278 Next, the rMV-ZIKV viruses were purified over a 20% sucrose-cushion and analyzed by SDS-  
279 PAGE (10%). The Sypro-ruby stained gel showed the presence of all six MV structural proteins  
280 in the MV-NS1(2), MV-E-NS1(2), and MV-E-NS1(6) viruses, similar to empty vector rMV and  
281 MV-E2 viruses (Fig. 3C). Western blot analysis of the similar SDS-PAGE of purified rMV-  
282 ZIKV vaccines probed for ZIKV-E showed an absence of ZIKV-E in all constructs except MV-  
283 E-NS1(6) (Fig. 3D) in the virion. The ZIKV-E and -NS1 may sometimes co-purify with the  
284 virions, as seen by the slight ZIKV-E band in MV-E-NS1(6), as well as NS1 bands seen in the  
285 MV-E-NS1(6), MV-NS1(2), and Zika virus virions (Fig. 3D). The western blot of sucrose  
286 purified virions showed the presence of MV-H in all MV's except for the control Zika virus  
287 virions.

288

289 Cell lysates obtained from Vero cells infected by rMV-ZIKV vaccines at a MOI of 5 for 60  
290 hours were probed for ZIKV-E, ZIKV-NS1, and MV-N in a western blot (Fig. 3E). The western  
291 blot confirmed the expression of ZIKV-E in MV-E-NS1(6) and MV-E2, with greater expression  
292 seen for the MV-E-NS1(6). A faint ZIKV-E band is seen in the MV-E-NS1(2) cell lysates, which

293 correlates with its slow replication (Fig. 3E, Supplemental Fig. S7). The ZIKV-NS1 expression  
294 is the highest in the MV-NS1(2) cell lysates, with low levels seen in the MV-E-NS1(6) and the  
295 control Zika virus infected cell lysates. The low-levels of ZIKV-NS1 seen may be due to the  
296 efficient secretion of the NS1 out of the cells. No ZIKV-NS1 was seen in the MV-E-NS1(2) cell  
297 lysates. A similar MV-N expression was seen in all the recombinant MV cell lysates (Fig. 3E).  
298 Similar levels of the actin control were detected in the western blot of the cell lysates (Fig. 3E).

299  
300 Next we wanted to characterize the ZIKV-E and ZIKV-NS1 protein secreted by our MV-ZIKV  
301 vaccines. The purified SVPs resuspended in non-reducing buffer were probed for ZIKV-E and  
302 ZIKV-NS1 in a western blot (Supplemental Fig.S8). The ZIKV-E probed blot showed the  
303 presence of a monomeric and a dimeric band similar to the Zika virus made SVP, in the MV-E2  
304 and the MV-E-NS1(6) lane, while no band is seen in the controls— empty MV, MV-NS1(2)  
305 lanes. In addition, a faint-strong band above 250 kDa was also seen in MV-E2, MV-E-NS1(6),  
306 and Zika virus lanes. This suggests that the 1<sup>st</sup> and 2<sup>nd</sup> generation MV-ZIKV vaccine generates  
307 SVPs similar to the Zika virus. The blot probed for NS1 yielded a smear ranging from 55kDa to  
308 ~70kDa above the size of the monomeric NS1 (50kDa), indicating that the NS1 made by the  
309 MV-ZIKV vaccines was in a combination of monomeric and dimeric (membrane bound) forms.  
310 SVPs for the MV-E0 virus could not be purified and were therefore not included in this blot.

311  
312 ***Efficacy of second-generation MV-ZIKV vaccines using lethal mouse-adapted ZIKV African***  
313 ***MR766 strain***

314 Six groups of five female *hCD46 IFN $\alpha$  $\beta$ R<sup>-/-</sup>* mice (10- to 12-weeks old) each were immunized  
315 with 10<sup>5</sup> TCID<sub>50</sub> i.p. on day 0 and boosted on day 21 with either MV-NS1(2), combination

316 vaccine group—MV-E2 & MV-NS1(2), MV-E-NS1(6), MV-E2, and two PBS groups (Fig. 4A).  
317 The combination vaccine group received  $10^5$  TCID<sub>50</sub> each of MV-E2 & MV-NS1(2) vaccine ( $2 \times$   
318  $10^5$  TCID<sub>50</sub> total) (Fig. 4A). The MV-E-NS1(2) was not included in this study because a pilot  
319 study with it failed to achieve seroconversion in mice, apparently due to its slow replication  
320 (Supplemental Fig. S7). For all time points, the combination vaccine group elicited similar  
321 ZIKV-E IgG antibody titers to the MV-E2 vaccine group, with only modestly higher ZIKV-E  
322 responses than the MV-E-NS1(6) vaccinated animals ( $p = 0.05$ ) (Fig. 4B). The MV-NS1(2) and  
323 the MV-E-NS1(6) elicited similar ZIKV-NS1 antibody titers, while the combination vaccine  
324 group had lower ZIKV-NS1 responses (Fig. 4C). The combination vaccine group had similar  
325 MV-H responses to the MV-E2 group, but significantly higher titers than the MV-NS1(2) and  
326 the MV-E-NS1(6) groups (Fig. 4D).

327  
328 Based on the collected immunogenicity data, we decided to challenge the mice on day 49 with  
329  $10^4$  FFU of ZIKV African MR766 strain s.c., with the exception of one PBS group that was  
330 mock challenged with PBS. As expected, the combination vaccine group MV-E2 & MV-NS1,  
331 the MV-E-NS1(6) group, and the MV-E2 group survived the challenge, showing no signs of  
332 ZIKV disease (Fig. 4F). No detectable ZIKV RNA was seen in the blood of the combination  
333 vaccine group, while one animal in the MV-E2 and the MV-E-NS1(6) groups showed the  
334 presence of ZIKV that was cleared by day 14 of the challenge (Fig. 4G). Significantly lower  
335 ZIKV RNA was seen in the brains and female reproductive organs (Fig. 4H & I) of the MV-E2  
336 and MV-E-NS1(6) mice than in the MV-NS1(2) mice and the PBS mice that succumbed to the  
337 challenge. The combination group had significantly lower viral RNA in the brains, and complete  
338 viral clearance in the female reproductive organs than the MV-E2 and MV-E-NS1(6) vaccinated

339 animals. The viral clearance achieved by the combination vaccine MV-E2 & MV-NS1 can be  
340 correlated with it, eliciting the highest ZIKV neutralizing antibodies of all groups (Fig. 4E & J).  
341 Lower ZIKV neutralizing antibodies were observed in the MV-E2 and the MV-E-NS1(6) group,  
342 and, as expected, no neutralizing activity was seen in the MV-NS1(2) group. One animal from  
343 the combination vaccine and the MV-E-NS1(6) group died due to unrelated reasons on day 30.

344

#### 345 ***The combination vaccine, MV-E2 & MV-NS1(2), induces durable plasma cell responses***

346 Three groups of five female *hCD46 IFN $\alpha$  $\beta$ R<sup>-/-</sup>* mice (10- to 12-weeks old) were immunized i.p.  
347 with the  $2 \times 10^5$  TCID<sub>50</sub> of the combination vaccine, MV-E2 & MV-NS1(2) (i.e.,  $10^5$  TCID<sub>50</sub> of  
348 each virus), rMV, or PBS on day 0 and boosted on day 21. Their bone marrow and spleen were  
349 harvested on day 49 and assessed for the presence of ZIKV-E-, ZIKV-NS1-, and MV-H-specific  
350 long-lived and short-lived plasma cells (Fig. 5A). High ZIKV-E and MV-H IgG responses were  
351 seen in the combination vaccine group, while ZIKV-NS1 IgG responses were variable within the  
352 group (Fig 5B-D). Induction of high ZIKV neutralizing titers was observed in the combination  
353 vaccine group (Fig.5F). ZIKV-E specific long-lived plasma cells (LLPCs) were detected in the  
354 bone marrow, and short-lived plasma cell (SLPCs) responses were detected in the spleen of the  
355 combination vaccine group (Fig. 5G). Similar to the low-level ZIKV-NS1 antibody responses,  
356 the ZIKV-NS1 LLPCs and SLPCs were also low-level (Fig. 5H). Additionally, the MV-H  
357 specific LLPCs and the SPLCs in the combination group were similar to those of the empty  
358 vector rMV group, indicating that the addition of ZIKV-E and NS1 did not affect the vector  
359 response (Fig. 5I).

360

#### 361 ***Measles virus neutralizing titers induced by the combination vaccine, MV-E2 & MV-NS1(2)***

362 Sera from the previous experiment (Fig. 5) were assessed for the presence of MV-neutralizing  
363 titers. The combination vaccine group induced similar measles neutralizing titers to the empty  
364 vector rMV group (Fig. 5E), indicating that measles immunity was unaffected by the addition of  
365 ZIKV-E and NS1.

366

367 ***Efficacy of the combination vaccine, MV-E2 & MV-NS1(2), in pregnant mice using a lethal***  
368 ***mouse-adapted Zika African MR766 strain***

369 Based on results indicating that the combination of MV-E2 and MV-NS1(2) can protect the  
370 female reproductive tract (Fig. 4), we conducted additional research using this combination  
371 vaccine in a pregnant mouse model. Three groups of ten female *hCD46 IFN $\alpha$ BR<sup>-/-</sup>* mice (10- to  
372 12-weeks old) were immunized i.p with the  $2 \times 10^5$  TCID<sub>50</sub> of the combination vaccine, MV-E2  
373 & MV-NS1(2) (i.e.,  $10^5$  TCID<sub>50</sub> of each virus), and two PBS groups on day 0 and boosted on day  
374 21 (Fig. 6A). The mice generated high ZIKV-E and MV-H antibody titers (Fig. 6B & D), but  
375 low-level to no ZIKV-NS1 antibodies (Fig. 6C) similar to the results of the previous experiments  
376 (Fig. 4C and 5C). Superovulation was induced in the mice by injecting 5 IU/mouse of pregnant  
377 mare serum gonadotropin (PMSG; i.p.) on day 36 (day-3 to pregnancy), and 5 IU/mouse of  
378 human chorionic gonadotropin (hCG; i.p.) on day 38 (day-1 to pregnancy). C57BL/6 males were  
379 placed in the cage, and the next day was considered day 0 of pregnancy. The mice were checked  
380 for plugs, weighed daily, and challenged with  $10^2$  FFU of lethal ZIKV African MR766 strain on  
381 day 49-56, depending on pregnancy status being embryonic age 10.5-11.5 days, and humanely  
382 euthanized on day 17.5-18.5. The pregnant mice in the combination vaccine group had high  
383 ZIKV-E and moderate NS1 IgG responses (as shown by the blue filled black triangle). One PBS  
384 group was mock challenged with PBS. The combination vaccine group and the PBS group had

385 three pregnant mice each, while the PBS-mock challenged group had four pregnant mice. The  
386 ZIKV-challenged PBS group showed signs of severe ZIKV disease at the necropsy timepoint,  
387 while the combination vaccinated animals showed no signs of disease. The pregnant females in  
388 the combination vaccine group had significantly lower or no viral RNA in the blood, brain, and  
389 placenta than the PBS group (Fig. 6F). Fetal heads from the combination vaccine group showed  
390 no presence of ZIKV RNA, with 88.5% intact fetuses and the remaining resorbed (Fig. 6G). The  
391 PBS challenged fetuses had significantly higher ZIKV RNA presence in the fetal heads, with  
392 28% intact and 72% resorbed fetuses. Meanwhile, 94.7% intact and 5.3% resorbed fetuses were  
393 seen in the PBS unchallenged mice. The combination vaccine group had high ZIKV neutralizing  
394 titers on day 28 and at necropsy (Fig. 6E & H).

395 **Discussion**

396 Several candidate ZIKV vaccines are in Phase 1 clinical trials, with the most advanced being the  
397 DNA, mRNA, live-attenuated Zika virus (rZIKV/D4Δ30-713), and the alum adjuvanted Zika  
398 purified inactivated virus vaccines (17). Both the DNA vaccine and the inactivated virus  
399 vaccines are safe platforms that have been well-tolerated in humans (18, 20). Despite these  
400 results, recent studies with the same DNA vaccine found that it did not completely prevent  
401 adverse fetal outcomes in pregnant monkeys under prolonged ZIKV exposure (25). Another  
402 candidate vaccine—the Zika purified inactivated virus (ZPIV) vaccine failed to induce durable  
403 immune responses beyond eight weeks of vaccination in phase 1 clinical trials (36). This data  
404 suggests that further development in ZIKV vaccine strategies is paramount for the protection of  
405 susceptible pregnant women and their unborn fetuses. We tested the effectiveness of our  
406 combination MV-based ZIKV vaccine in the pregnant mouse model, and our findings indicated  
407 that a combination of MV-E2 and MV-NS1(2) vaccine could protect the female reproductive  
408 tract and their unborn fetuses.

409

410 There have been concerns that a ZIKV vaccine induces cross-reactive E protein-specific (mostly  
411 envelope domain I/II, fusion loop epitope-FLE) antibodies shared across flaviviruses and can  
412 potentiate antibody-dependent enhancement (ADE). ADE has been described among the dengue  
413 virus (DENV) strains and has had implications for the development of a DENV vaccine. Several  
414 *in-vitro* and *in-vivo* mouse studies have confirmed ADE of ZIKV with DENV antibodies and  
415 vice versa (37). ADE caused by the presence of DENV antibodies has been speculated to be one  
416 of the reasons for ZIKV-induced microcephaly (38). The hypothesis that transcytosis of IgG-  
417 virion complexes can occur across the placenta by utilizing the neonatal Fc receptor (FcRn)



418 emerged from *in-vitro* studies in cytomegalovirus (CMV) and HIV (39). *In-vitro* studies of ZIKV  
419 enhancement in human placental tissue in the presence of DENV antibodies strengthened the  
420 hypothesis (40). However, human and monkey studies have indicated that prior DENV exposure  
421 provides some cross-protection to ZIKV infection, and vice versa (41, 42). Therefore, we do not  
422 expect our vaccine to cause ADE of DENV.

423  
424 Different ZIKV strains have varied pathogenicity, with the Asian PRVABC59 strain being non-  
425 pathogenic and the African MR766 strain being extremely lethal in *IFN $\alpha$  $\beta$ R<sup>-/-</sup>* mice. The African  
426 MR766 strain is also the most potent at causing brain damage and postnatal lethality in mice  
427 (43). We investigated the immunogenicity and efficacy of MV vaccine vector-based ZIKV  
428 vaccines in *hCD46 IFN $\alpha$  $\beta$ R<sup>-/-</sup>* mice. The first-generation ZIKV vaccines, both expressing the  
429 full-length preME, MV-E0, and the MV-E2 vaccines, induced high ZIKV-E neutralizing  
430 antibodies and were protective when challenged with the non-lethal Asian PRVABC59 ( $10^6$   
431 FFU) strain and the lethal African MR66 ( $10^4$  FFU) strain. Both vaccines achieved neutralizing  
432 titers above the correlate of protection determined by the adjuvanted purified inactivated Zika  
433 vaccine in rhesus macaques but did not achieve complete viral clearance in the lethal challenge  
434 model (44). The ZIKV-3'UTR-LAV-, GAd-Zvp-, and the E-dimer-vaccinated mice had  
435 similarly incomplete ZIKV clearance in organs when challenged with another ZIKV African  
436 strain (Dakar) (24, 45-47).

437  
438 Recent studies have indicated that ZIKV NS1 antibodies and T cell responses play protective  
439 roles (48). But interestingly, we found that the NS1 antibodies themselves did not protect the  
440 mice from the lethal African MR766 challenge, as the MV-NS1(2) vaccinated animals

441 succumbed to ZIKV disease. Similar results were observed in NS1-DNA vaccinated animals  
442 (49). Both the MV-E2 and MV-E-NS1(6) mice survived the challenge and showed significantly  
443 lower ZIKV RNA in the blood and brain of these mice compared to the PBS mice. We observed  
444 almost complete viral clearance in the female reproductive tract MV-E-NS1(6) vaccinated mice,  
445 while the combination group completely cleared ZIKV RNA from the reproductive tract,  
446 suggesting that NS1 antibodies played a role in this enhanced protection. The combination  
447 vaccine, MV-E2 & MV-NS1(2), also protected the fetuses in a lethal pregnant mouse model. In  
448 addition, the induction of ZIKV-E and ZIKV-NS1 long-lived plasma cell (LLPC) and short-lived  
449 plasma cell (SLPC) responses were seen in the combination vaccine group. Such durable  
450 responses have only been observed in the GAd-Zvp vaccinated animals that showed the presence  
451 of ZIKV-E LLPC's and memory B cells (45). Taken together, the combination vaccine, MV-E2  
452 & MV-NS1(2), is the first vaccine to provide complete fetal protection and viral clearance in the  
453 placenta when challenged with the African MR766 strain.

454  
455 Past studies had shown that high E specific neutralizing titers were predictive of protection for  
456 other flaviviruses, however high ZIKV-E specific neutralizing were not sufficient to completely  
457 prevent adverse fetal outcomes in mice for several candidate vaccines (24, 46). Comparative  
458 studies of soluble preME ( $\Delta$ Stem/TM) and full-length preME as the immunogen using either the  
459 DNA vaccine or gorilla adenovirus vector (GAd) or VSV vector indicated that the full-length  
460 prME might provide better protection in terms of controlling ZIKV replication (45, 50-52). The  
461 full-length preME assembles into a subviral particle (SVP) while the preME ( $\Delta$ Stem/TM) is  
462 secreted as a soluble E protein alone, which may affect the epitopes exposed and thereby affect  
463 the quality of antibodies generated (53). The SVP characterization of the MV-ZIKV vaccines

464 that express either prME or prME-NS1 suggests that it makes SVPs similar to the Zika virus,  
465 thereby exposing antigenically relevant epitopes to the immune system. While the NS1  
466 expressed by MV-ZIKV vaccines are mostly a mixture of monomeric and dimeric forms,  
467 suggesting that the candidate vaccines make the membrane bound NS1. The secreted membrane  
468 bound NS1 may expose epitopes that allow for better targeting of infected cells.

469

470 Our findings add to the knowledge base on how a vaccine could be designed in order to provide  
471 complete fetal protection against ZIKV. Previously tested mRNA, DNA, and GAd-Zvp vaccines  
472 using the preME or preME-FLE (ZIKV-E fusion loop epitope mutant) as the antigen have been  
473 found to induce very high ZIKV neutralizing titers but failed to achieve complete placental  
474 and/or fetal protection in the vaccinated pregnant mice and primates (24, 25, 45, 54). An  
475 exception to this finding was demonstrated in the Jagger et al. study that observed complete  
476 placental and fetal protection in an mRNA-LNP vaccinated hSTA2-KI mouse model using the  
477 MA-ZIKV Dakar 41525 strain. This may be due to the reduced viremia induced by the MA-  
478 Dakar 41525 strain and the immunocompetent model allowing for adequate innate immune  
479 responses to control viral spread (55). ZIKV-E FLE antibodies have demonstrated ADE activity  
480 *in-vitro* and in mice and are suspected to be causing the adverse fetal outcomes. An alternative  
481 approach of using two DIII (domain III is the receptor-binding domain) monoclonals was  
482 investigated and found to reduce fetal pathology in primates but did not prevent maternal viral  
483 spread (56) . Another group showed that a measles-based vaccine expressing preME  
484 ( $\Delta$ Stem/TM) did not clear ZIKV from the placenta of the vaccinated animals in a low-dose Asian  
485 strain challenge, verifying the importance of full-length preME as the immunogen (57).

486 NS1 antibodies and T cell responses provided partial protection or protection in low-dose  
487 challenge models using the VSV and DNA vaccine platforms, but the MVA-NS1 vaccine was  
488 the only NS1 vaccine found to protect against a lethal African strain challenge in CD-1/ICR mice  
489 (13, 23, 49, 51). The two LAVs, 3'UTR- $\Delta$ 10-LAV and the ZIKV-NS1-DKO (4 amino acid  
490 substitutions in the NS1 glycosylation sites), were tested in pregnant mouse models, and the  
491 3'UTR- $\Delta$ 10-LAV protected pregnant mice from the Asian PRVABC59 strain while the ZIKV-  
492 NS1-DKO failed to clear the ZIKV from fetal brains. Neither LAV study reported the NS1-  
493 specific antibodies or T cell responses induced by the vaccine (24, 58). In addition, the DNA  
494 vaccine that protected non-pregnant monkeys in an Asian PRVABC59 strain challenge failed to  
495 completely prevent maternal viremia and adverse fetal outcomes in pregnant monkeys (15, 25).  
496 Human studies on maternal antibodies of microcephalic newborns have observed an increase in  
497 ZIKV neutralizing capacity, with antibodies directed towards EDIII and lateral ridge EDIII  
498 antibodies in comparison to control newborns without microcephaly. This study also highlighted  
499 that mothers of microcephalic infants developed much lower NS1 antibodies than control  
500 newborns without microcephaly (59). Conversely, another study by the same group showed that  
501 antibody responses in individuals who developed high anti-ZIKV neutralizing antibodies had  
502 high EDIII and EDIII lateral ridge epitope antibodies (60). The two Robbiani et al. results  
503 congruently verify our hypothesis that both ZIKV-E and NS1 responses are needed for placental  
504 and fetal protection. To further corroborate this theory, high ZIKV NS1 antibody responses were  
505 observed in healthy Thai people who had high ZIKV neutralizing antibodies (11).

506

507 Collectively, our study and the published data suggest that ZIKV-E neutralizing antibodies  
508 protect non-pregnant mice and monkeys, while NS1 antibodies cannot provide such protection

509 by themselves. An exception to this is the MVA-NS1 vaccine, which was tested in another  
510 mouse model. While ZIKV-E neutralizing antibodies are essential, the NS1 antibodies and T cell  
511 responses may aid its faster viral clearance (49, 61). More importantly, CD4<sup>+</sup> T cells were  
512 recently identified as playing a vital role in the protection from ZIKV-induced neurologic disease  
513 and viral control (62). While the measles vaccine induces robust CD4<sup>+</sup> and CD8<sup>+</sup> T cell  
514 responses in infants (> 6 months) and adults, the CD4<sup>+</sup> and CD8<sup>+</sup> T cell responses are yet to be  
515 examined for the MV-ZIKA combination vaccine (63). Also, the low titer or incomplete  
516 seroconversion against NS1 induced by the combination vaccine may require further adjustment  
517 in the vaccine titers of the MV-E2 and MV-NS1(2) vaccines. Production and safety of the  
518 combination vaccine should follow the precedent of the measles vaccine, making it an ideal  
519 childhood vaccine platform. Hence, the combination vaccine, MV-E2 & MV-NS1(2), is a  
520 promising candidate ZIKV vaccine that warrants further preclinical development.

## Materials and Methods

### 521 Experimental Design

522 Five *hCD46 IFN $\alpha\beta$ R<sup>-/-</sup>* (IFNARCD46tg) breeding pairs were received from Dr. André Lieber  
523 (University of Washington, Seattle). Both male and female *hCD46 IFN $\alpha\beta$ R<sup>-/-</sup>* mice were used in  
524 this study. For the pregnant mouse model, *hCD46 IFN $\alpha\beta$ R<sup>-/-</sup>* mice were housed individually in  
525 microisolator cages. 8 to 10 weeks-old C57BL/6 male mice were purchased from Charles River  
526 for the pregnant mouse model.

527  
528 Immunizations were conducted by inoculating mice with vaccines in 100  $\mu$ l via intraperitoneal  
529 (i.p) or intramuscular route (i.m., 50  $\mu$ l into each gastrocnemius muscle). ZIKV challenges were  
530 performed by subcutaneous inoculation in the hind limb with 10<sup>4</sup> FFU of the mouse-adapted  
531 ZIKV African MR766 strain or 10<sup>6</sup> FFU of the ZIKV Asian (PRVABC59 strain) in 100  $\mu$ l PBS  
532 in non-pregnant mice. For the pregnancy experiments, super-ovulation was induced as the  
533 *hCD46 IFN $\alpha\beta$ R<sup>-/-</sup>* female mice produce 5-6 pups under normal breeding conditions. *hCD46*  
534 *IFN $\alpha\beta$ R<sup>-/-</sup>* female mice were i.p. injected with 5IU/mouse of pregnant mare serum gonadotropin  
535 (PMSG) on day 36 and 5IU/mouse of human chorionic gonadotropin (hCG) on day 38 to induce  
536 super-ovulation. Super-ovulated *hCD46 IFN $\alpha\beta$ R<sup>-/-</sup>* females were mated with naive wild-type  
537 C57BL/6 male mice on day 38. Females were checked for plugs the next day (day 39) and  
538 weighed daily until the end of the experiment. At E10.5-11.5, C57BL/6 male mice were  
539 removed from the cage and pregnant dams (*hCD46 IFN $\alpha\beta$ R<sup>-/-</sup>*) were inoculated with 10<sup>2</sup> FFU of  
540 the mouse-adapted ZIKV African MR766 strain by subcutaneous injection in the hind limb.  
541 Animals were sacrificed at E17.5-18.5, and placentas, fetuses, and maternal tissues were  
542 harvested. All African challenged mice were euthanized when ethically defined clinical

543 endpoints were reached (hind-limb paralysis). Mice were randomly allocated to groups. All  
544 experiments had five mice per group, except for the pregnant mouse study. For the pregnant  
545 mouse study- 10 mice vaccinated, and 20 control animals were mated, wherein three vaccinated  
546 and three PBS mice and four PBS-mock challenged mice were impregnated.

547

#### 548 **Animals and care**

549 This study was carried out in strict adherence to recommendations described in the Guide for the  
550 Care and Use of Laboratory Animals (39), as well as guidelines of the National Institutes of  
551 Health, the Office of Animal Welfare, and the United States Department of Agriculture. All  
552 animal work was approved by the Institutional Animal Care and Use Committee (IACUC) at  
553 Thomas Jefferson University (animal protocol 01155 and 01873). All procedures were carried  
554 out under isoflurane anesthesia by trained personnel under the supervision of veterinary staff.  
555 Mice were housed in cages, in groups of five, under controlled conditions of humidity,  
556 temperature, and light (12-h light/12-h dark cycles). Food and water were available ad libitum.

557

#### 558 **Cells**

559 Vero-CCL81, Vero-E6, and 293T/T17 cells were purchased from ATCC and maintained in high  
560 glucose Dulbecco's modified Eagle's medium (DMEM, Corning, 10-017-CV) supplemented  
561 with 5% fetal bovine serum (FBS, R&D SYSTEMS, S11150) and 1% penicillin/streptomycin  
562 (P/S, Gibco, 15140122) and cultured at 37°C with 5% CO<sub>2</sub>.

563

#### 564 **Viruses**

565 The following ATCC viral stocks were purchased for this study. Zika virus African MR766  
566 strain (ATCC, VR-1838), Zika virus Asian PRVABC59 strain (ATCC, VR-1843), and measles  
567 virus low-passage Edmonston strain (ATCC, VR-24).

568

### 569 **Antibodies**

570 The following antibodies were used in this study: Anti-ZIKV-E mouse monoclonal antibody  
571 (Biofront Technologies, 1176-56), Pan-Flavivirus-E 4G2 mouse monoclonal antibody produced  
572 from hybridoma cell line D1-4G2-4-15 (ATCC, HB-112), Anti-Measles Nucleoprotein mouse  
573 monoclonal antibody produced from hybridoma NP.cl25 (Millipore Sigma, Cat # 95051114).

574

### 575 **Recombinant MV-ZIKV vaccines plasmid construction**

576 To generate the first-generation MV-ZIKV vaccines the codon optimized Zika prME gene  
577 (signal peptide= MR766 strain, GenBank: MK105975.1 and prME sequence= PRVABC59  
578 Asian 2015; GenBank: KU501215.1; Supplemental Fig. S1) was synthesized by GenScript. PCR  
579 amplification of the coding region of Zika prME from the gene synthesized plasmid was  
580 performed using primers ZMP Fwd1 (5'-

581 GTGTCGACGCGTGGAATCCTCCCGTACGGCCACCATGGGGGCTGATA

582 CAAGCATTGGCA - 3') and ZMP Rev1 (5'-

583 GTGTCGGACGTCATTTATGCGGACACTGCG

584 GTGGACAGAAAA-3'). PCR fragments were digested with the respective enzymes and ligated  
585 into the ATS-0 or ATS-2 MV vector to generate MV-E0 and MV-E2, respectively (JM109  
586 *E.coli*). The MV virus (Edmonston B strain) vaccine vector expressing GFP at ATS-0 flanked by  
587 BsiWI, and AatII restriction sites were received from Dr. R. Cattaneo. This vector was modified



588 to include a hammerhead ribozyme at the 5' end (ATS-0 MV vector). A MV (Edmonston B  
589 strain) vaccine vector (ATS-2 MV vector) was generated to create an additional transcriptional  
590 site (ATS) by inserting MluI and AatII sites at ATS-2.

591

592 To generate the 2<sup>nd</sup> generation MV-ZIKV vaccines, the codon optimized Zika prME-NS1 gene  
593 (strain PRVABC59 Asian 2015; GenBank: KU501215.1; Supplemental Fig. S5) was synthesized  
594 by GenScript. PCR amplification of the coding region of Zika prME-NS1 from the gene  
595 synthesized plasmid was performed using primers MV-ZprME-NS1(2) Fwd (5'-  
596 ACAGAGTGATACGCGTACGGGCCACCATGGGGG-3') and MV-ZprME-NS1(2) Rev (5'-  
597 GCACGCGATCGCAAGACGTCGGCTATGCTGTCACC-3'). PCR fragment was inserted into  
598 the ATS-2 MV vector to generate MV-E-NS1(2) by In-Fusion cloning (Stellar cells). An  
599 additional MV (Edmonston B strain) vaccine vector (ATS-6 MV vector) was generated to create  
600 an additional transcriptional site (ATS) by inserting MluI and SpeI sites at ATS-6. PCR  
601 amplification of the coding region of Zika prME-NS1 from the gene synthesized plasmid was  
602 performed using primers MV-coZprME-NS1(6) Fwd (5'-  
603 ACAGAGTGATACGCGTACGGGCCACCATGGGGGCTGA  
604 TAC-3') and MV-coZprME-NS1(6) Rev (5'-  
605 TCTATTTTCACTAGTGCGATCGCGACGTCG  
606 GCTATGCTGTCACC-3'). The PCR fragment was digested and inserted into ATS-6 MV vector  
607 to generate MV-E-NS1(6). PCR amplification of the coding region of Zika prME-NS1 from the  
608 gene synthesized plasmid (Supplemental Fig. S6) was performed using primers MV-coNS1 Fwd  
609 1 (5'- ACAGAGTGATACGCGTACGGGCCACCATGGAGACAGACACACTCCT-3') and  
610 MV-coNS1 Rev 1 (5'- GCACGCGATCGCAAGACGTCGGCTATGCTGTCACCATAGAGCG

611 GACCAGGTTG-3') was used to generate fragment 2. Fragment 2 was digested by restriction  
612 enzymes MluI, SgrAI. In order to insert the human IgKappa signal peptide at ATS-2 to allow for  
613 better secretion of ZIKV-NS1, fragment 1 was generated by PCR amplification using primers  
614 IgKappa Fwd 2 (5'-  
615 ACAGAGTGATACGCGTGGCCACCATGGAGACAGACACACTCCTGC  
616 TATGGGTACTGCTGCTCTGGGTTCAGGTTCCACG-3') and IgKappa Rev 2 (5'-  
617 ACACGAACACGCCGGTGCCACACCGTGTCTCCTTCTTAGAAAAATCCACGGAGCATC  
618 CCACGTCACCAGTGAACCTGGAACCCAGA-3'). The PCR fragments 1, and 2 were inserted  
619 into the ATS-2 MV vector to generate MV-NS1(2) by In-Fusion cloning (Stellar cells).

620

### 621 **Virus recovery**

622 293T/T17 cells ( $0.8 \times 10^6$  cells per well) were pre-seeded in 6 well plates. The MV-ZIKV viruses  
623 and control MV's were rescued from their full-length cDNA with the helper-plasmid rescue  
624 system. 293T/T17 cells were transfected with pCAGGS-T7, pTIT-MVN (MV-Nucleoprotein),  
625 pTIT-MVP (MV-Phosphoprotein), and pEMC-MVLa (MV-Large protein), using the  
626 XtremeGene9 reagent (Millipore Sigma). After overnight incubation at 37°C, the cells were heat  
627 shocked at 42°C for 3 hours and then returned to 37°C. After 3 days of incubation at 37°C,  
628 transfected cells were transferred onto a monolayer of Vero cells and incubated at 37°C. Virus  
629 was harvested from Vero cells when syncytia involved 80% to 90% of the culture by scraping  
630 infected cells, freeze-thawing cells, and medium, and centrifuging them to remove cellular  
631 debris.

632

### 633 **Virus production**

634 The Measles viruses were grown in T175 flask with sub-confluent Vero cells in Optipro SFM.  
635 The medium was changed every 3-4 days, and supernatant was collected until the cell monolayer  
636 came-off. The low passage MV Edmonston strain (ATCC-VR 24) was propagated by  
637 inoculating 100  $\mu$ L of the original ATCC vial into a T175 flask pre-seeded with Vero cells (80%  
638 confluent) in 32 mL of 1X DMEM (2% FBS) and placed 37°C in a humidified 5% CO<sub>2</sub>  
639 atmosphere. The virus supernatant was harvested after 12 days. The virus was harvested by  
640 freeze-thawing cells and medium, centrifuging them at 3000 rpm for 10 minutes to remove  
641 cellular debris. Viral supernatants were tittered, aliquoted, and frozen at -80°C.

642  
643 Zika viruses were grown in a T175 flask with sub-confluent Vero cells in 1X DMEM (2% FBS,  
644 1% PS). The medium was changed every 3-4 days, and the supernatant was collected until the  
645 cell monolayer came-off. The harvested virus was tittered on Vero cells, and high titer stocks  
646 were aliquoted and frozen at -80°C

647

#### 648 **Virus titration**

649 Measles virus titration: Measles virus titers were analyzed as 50% tissue culture infectious dose  
650 (TCID<sub>50</sub>) by the Reed–Muench method. 10<sup>4</sup> Vero cells in 100  $\mu$ L per well were pre-seeded in a  
651 96 well flat-bottom plate 2 hours before the addition of the virus to the well. 180 $\mu$ L of 1X  
652 DMEM (Corning, Cat# 10-017-CV) was added to every well of the 96 well round bottom plate  
653 (dilution plate). 20  $\mu$ L of one virus was added to Column 1 of the dilution plate. Twelve 10-fold  
654 serial dilutions of the virus were performed in the dilution plate in a total volume of 200  $\mu$ L per  
655 well. 30 $\mu$ L of the diluted virus was transferred from one row to each row of the 96 well plates  
656 pre-seeded with cells, changing tips between each row. Two plates were prepared per inoculum.

657 Plates were incubated at 37°C for 4 days. On day 4, plates were fixed with 80% Acetone for 10  
658 mins at 4°C. The fixation solution was aspirated, and plates were allowed to air dry. Cells were  
659 blocked for 1hour in FACS buffer and stained with 100µL of Anti MV-N c125 mouse  
660 monoclonal antibody (2 µg/mL in FACS buffer-1X PBS, 10%FBS, 0.05% Sodium azide) for 2  
661 hours. Plates were washed 3X with FACS buffer and stained with secondary antibody, Cy3-  
662 conjugated Goat Anti-mouse IgG (2 µg/mL in FACS buffer) for 2 hours. After 3X washes with  
663 FACS buffer and plates were read using a fluorescence microscope. The TCID<sub>50</sub> titer was  
664 calculated with the following formula:

$$665 \quad \text{Log}_{10}(\text{TCID}_{50}/\text{ml}) = L + d \left( \frac{s}{g} - 0.5 \right) + \text{Log}_{10} \left( \frac{1}{v} \right)$$

666  
667 Where L is the reciprocal of the last dilution in which all well is positive, d is the log<sub>10</sub> of  
668 dilution factor, v is the volume of inoculum (ml/well).

669  
670 Zika virus titration: ZIKV stocks were propagated in Vero cells or C6/36 cells and titrated by  
671 focus-forming assay (FFA) as described previously (64). Briefly, ten-fold serial dilutions of  
672 ZIKV in 1X DMEM (Corning, Cat# 10-017-CV) supplemented with 2% fetal bovine serum  
673 (R&D systems, Cat# S11150) and 20U/mL Penicillin-Streptomycin (Gibco, Cat# 1540122) were  
674 performed in 96-well Costar (Corning, NY) plates. 2.5× 10<sup>4</sup> Vero or C6/36 cells per well were  
675 added to the 96 well plate incubated undisturbed for 3 days at 37°C. Media overlay was  
676 aspirated, and the cell monolayer was fixed with 80% Acetone for 10 minutes at 4°C. The  
677 fixation solution was aspirated, and plates were allowed to air dry. Cells were blocked for 1hour  
678 in FACS buffer and stained with Pan-Flavivirus E mouse monoclonal (1 µg/mL in FACS buffer)  
679 for 2 hours. Cells were then washed 3X with FACS buffer and stained with secondary antibody,

680 Cy3-conjugated Goat Anti-mouse IgG (Jackson ImmunoResearch, 2 µg/mL in FACS buffer) for  
681 2 hours. After 3X washes with FACS buffer and plates were read using a fluorescence  
682 microscope. For each sample, a dilution with easily distinguished foci is selected, and titer is  
683 calculated in focus-forming units per ml (FFU/ml), using the average of triplicate wells:

684

685

### 686 **Multi-step growth curve**

687 We infected Vero-CCL81 cells with wt or recombinant viruses at a multiplicity of infection  
688 (MOI) of 0.001, in triplicate. The infected cells and supernatant were harvested at 12, 24, 48, 72,  
689 96, 120, and 144 hpi, respectively. After three cycles of freeze-thawing and sonication of  
690 infected cells, lysates were centrifuged to remove cellular debris, and the supernatant was  
691 collected. The titer (TCID<sub>50</sub>/ml) of each sample was measured using Vero-CCL81 cells.

692

### 693 **Immunofluorescence assay (IFA)**

694  $8.5 \times 10^4$  Vero-E6 cells were seeded in 24 well plates with coverslips. After 18 hours, the cells  
695 were infected with the recovered MV-ZIKV viruses and controls at a MOI of 0.1 for 72 hours.  
696 The cells were permeabilized for 20 minutes at room temperature with BD Cytofix/Cytoperm  
697 (BD, 554714) and blocked with FACS buffer for 30 minutes. For Fig. 1B, Cells were stained  
698 with Biofront ZIKV-E mouse monoclonal antibody (1µg/mL) for 1 hour at room temperature  
699 (RT) on a rocker platform. Cells were washed 3X with FACS buffer and stained with secondary  
700 antibody Cy3-conjugated Goat Anti-mouse IgG (Jackson ImmunoResearch, 2 µg/mL in FACS  
701 buffer) for 1 hour at RT. For Fig. 3B, cells were stained with Biofront ZIKV-E mouse  
702 monoclonal antibody (1 µg/mL) and Anti-ZIKV NS1 human monoclonal antibody EB9

703 (2µg/mL) for 1 hour at room temperature (RT) on a rocker platform. Cells were washed 3X with  
704 FACS buffer and stained with secondary antibodies Alexa Fluor 568 -conjugated goat anti-  
705 mouse IgG (ThermoFisher Scientific, 2.5 µg/mL), and Alexa Fluor 647 conjugated goat α-  
706 human IgG (ThermoFisher Scientific, 2.5 µg/mL), for 1 hour at RT. For both Fig. 1B & 4B,  
707 cells were washed 3X with FACS buffer and stained with Anti MV-N cl25 mouse monoclonal  
708 antibody conjugated with Dylight 488 (5 µg /mL) at RT for 1 hour. Cells were washed 3X with  
709 FACS buffer and mounted with VECTASHIELD® Hardset™ Antifade Mounting Medium with  
710 DAPI (H-1500). Images were taken using Nikon A1R+ confocal microscope.

711

#### 712 **Viral sucrose purification and Cell lysates**

713 Larger amounts of MV-ZIKV and control MV supernatants were spun through a 20% sucrose  
714 cushion in an SW32 Ti rotor (Beckman, Inc.) at 25,000 rpm for 2 hours. ZIKV was spun through  
715 a 20% sucrose cushion at 30,000 rpm for 3.5 hours. Virion pellets were resuspended in  
716 phosphate-buffered saline (PBS), and protein concentrations were determined using a  
717 bicinchoninic acid (BCA) assay kit (Pierce). 6 well plates seeded with  $0.7 \times 10^6$  Vero cells, 16  
718 hours before they were infected with MV-ZIKV viruses and control viruses at a MOI of 5 for 60  
719 hours and harvested using Sabatini Buffer (40mM Tris,ph7.6; 120 mM NaCl; 1mM TRITON-  
720 X100; 0.4mM Sodium Deoxycholate; 1mM EDTA), and protein concentrations were determined  
721 using a bicinchoninic acid (BCA) assay kit (Pierce).

722

#### 723 **Purification of Subviral particles (SVPs)**

724 T175 flasks were infected with MV-ZIKV vaccines or controls at a MOI of 0.1. Larger amounts  
725 of MV-ZIKV and control MV and Zika virus supernatants were filtered through a 0.2 µm filter

726 (Rapid-Flow™ Sterile Disposable Bottle Top Filters with PES Membrane). The 0.2 µm filtration  
727 step was aimed to filter most of the MV particles (pleomorphic, 100-300 nm) out of the  
728 supernatant. The filtered supernatant was then spun through a 20% sucrose cushion at 48,000  
729 rpm for 3 hours in a SW55Ti rotor (Beckman Coulter). The SVP pellets were resuspended in a  
730 4X non-reducing buffer (Alfa Aesar, ThermoFisher, Cat# J63615-AD) in a total volume of  
731 100µL. SVPs for MV-E0 virus could not be purified and were therefore not included in this blot.

732

### 733 **SDS-PAGE and Western Blot**

734 The sucrose purified virus particles or cell lysates were denatured with 4X Laemmli Sample  
735 Buffer supplemented with 2-mercaptoethanol (10%) at 95°C for 10 minutes. 2.5 µg of sucrose  
736 purified virus or 5 µg of cell lysates or 10µL of the SVPs (in non-reducing buffer) was resolved  
737 on a 10% SDS–polyacrylamide gel and thereafter stained overnight with SYPRO Ruby for total  
738 protein analysis or transferred onto a nitrocellulose membrane in Towbin buffer (192 mM  
739 glycine, 25 mM Tris, 20% methanol) for Western blot analysis. The nitrocellulose membrane  
740 was then blocked in PBST (1X PBS, 0.05% Tween-20) containing 5% dried milk at room  
741 temperature for 1 hour. After blocking, the membrane was washed 3X with PBST and incubated  
742 overnight with Biofront ZIKV-E mouse monoclonal antibody (1µg/mL) or Anti MV-H Rabbit  
743 polyclonal sera (diluted 1:5000) or Anti MV-N cl25 mouse monoclonal antibody (1µg/mL) or  
744 Anti ZIKV-NS1 B4 mouse monoclonal antibody (1µg/mL) in 10% bovine serum albumin  
745 (BSA). After washing, the blot was incubated for 1 h with horseradish peroxidase (HRP)-  
746 conjugated anti-mouse/human/rabbit IgG diluted 1:20,000 in blocking buffer depending on the  
747 primary antibody used. Bands were developed with SuperSignal West Dura Extended duration  
748 substrate (Pierce).

749

750 **ZIKV Envelope Antigen**

751 Recombinant Zika Envelope protein antigen: The antigen used for ELISA and ELISPOT assay  
752 was purchased from Aalto BioReagents (AZ 6312).

753

754 **Recombinant Measles virus H and ZIKV-NS1 antigen**

755 A codon optimized MV-H gene (Edmonston B strain) was gene synthesized by GenScript. PCR  
756 amplification of the coding region of MV-H from the plasmid was performed using primers  
757 coMV-H61 N HA FWD (5'-TCGTGGTGCCAGATCTCACAGAGCCGCCATCTAT - 3') and  
758 coMV-H61 N-HA REV (5'- TCTCGAGCGGCGGCCGCCTACCTTCTATTTGTGCCG -3') to  
759 generate a fragment from amino acid 61 to 617 of MV-H protein (Supplemental Fig S9). The  
760 PCR amplified fragment was inserted by In-Fusion cloning (Stellar cells) into the pDisplay  
761 vector containing N terminal hemagglutinin (HA) tag that was cut with restriction enzymes BglII  
762 and NotI.

763

764 A codon optimized Zika prME-NS1 gene (strain PRVABC59 Asian 2015; GenBank:  
765 ANW07476.1) was gene synthesized by GenScript. The recombinant ZIKV-NS1 was  
766 constructed as published previously (13). Briefly, PCR amplification of the coding region of  
767 ZIKV-NS1 from the plasmid was performed using primers Sol coNS1 Fwd (5'-  
768 TGACGCACCTAGATCTAATGG  
769 CTCCATCTCTCTGATGTGC - 3') and Sol coNS1 Rev1 (5'- CGTATGGATAGTCGACAGCA  
770 CGTCCTGCTGTCACCATAGAGCGGACC-3') to generate a fragment that incorporated the  
771 last 24 amino acids of ZIKV envelope (NGSISLMCLALGGVLIFLSTAVSA) to the amino



772 terminus of the NS1 coding region (Amino acid 1-352). The PCR amplified fragment was  
773 inserted by In-Fusion cloning (Stellar cells) into the pDisplay vector containing C terminal HA  
774 tag that was cut with restriction enzymes BglIII and Sall.

775

776 Sub-confluent T175 flasks of 293T cells (human kidney cell line) were transfected with  
777 XtremeGene9 (150  $\mu$ L/flask) and a pDisplay vector encoding either the codon optimized MV-H  
778 fused to an N-terminal HA tag (50 $\mu$ g/flask) or codon optimized ZIKV-NS1 fused to an C-  
779 terminal HA tag (50 $\mu$ g/flask). Supernatant was collected between days 7 post transfection and  
780 loaded onto two different equilibrated anti-HA agarose (Pierce) columns containing a 2.5-ml  
781 agarose bed volume. The supernatant is recirculated overnight at 4°C using a peristaltic pump at  
782 1ml/minute. The column was washed with 10 bed volumes of PBS (0.05% Sodium Azide). After  
783 washing, antibody-bound MV-H was eluted with 5 ml of 250  $\mu$ g/ml HA peptide in PBS.  
784 Fractions were collected and analyzed for MV-H by Western blotting with monoclonal anti-HA-  
785 7 antibody (Sigma) prepared in 10% BSA. Peak fractions were then pooled and dialyzed against  
786 PBS in 10,000 molecular weight cutoff (MWCO) dialysis cassettes (Thermo Scientific) to  
787 remove excess HA peptide. After dialysis, the protein was quantitated by UV spectrophotometry  
788 and frozen in small aliquots at -80°C.

789

#### 790 **Enzyme-linked immunosorbent assay**

791 We tested individual mouse sera by enzyme-linked immunosorbent assay (ELISA) for the  
792 presence of IgG specific to ZIKV-E, ZIKV-NS1, and MV-H. To test for anti-ZIKV-E humoral  
793 responses, recombinant ZIKV-E (Alto BioReagents) was resuspended in a coating buffer (50 mM  
794 Na<sub>2</sub>CO<sub>3</sub> [pH 9.6]) at a concentration of 1  $\mu$ g /ml and then plated in 96-well ELISA MaxiSorp

795 plates (Nunc) at 100  $\mu$ l in each well. ZIKV-NS1 and MV-H were similarly resuspended in  
796 coating buffer (50 mM Na<sub>2</sub>CO<sub>3</sub> [pH 9.6]) at a concentration of 1  $\mu$ g/ml and then plated in 96-  
797 well ELISA MaxiSorp plates (Nunc) at 100  $\mu$ l per well. After overnight incubation at 4°C, plates  
798 were washed three times with 1X PBST (0.05% Tween 20 in 1 $\times$  PBS), which was followed by  
799 the addition of 250  $\mu$ l blocking buffer (5% dry milk powder in 1 $\times$  PBST) and incubation at room  
800 temperature for 1 hour. The plates were then washed three times with PBST and incubated  
801 overnight at 4°C with serial dilutions of sera in 1X PBST containing 0.5% BSA, 0.05% Sodium  
802 azide. Plates were washed three times the next day, followed by the addition of horseradish  
803 peroxidase-conjugated goat anti-mouse-IgG Fc secondary antibody (1:2000) (Southern Biotech,  
804 1033-05). After incubation for 2 hours at room temperature, plates were washed three times with  
805 PBST, and 200  $\mu$ l of o-phenylenediamine dihydrochloride (OPD) substrate (Sigma) was added to  
806 each well. The reaction was stopped by the addition of 50  $\mu$ l of 3M H<sub>2</sub>SO<sub>4</sub> per well. Optical  
807 density was measured at 490 nm (OD<sub>490</sub>) using BioTek Spectrophotometer. ELISA data were  
808 analyzed with GraphPad Prism 8. using a sigmoidal nonlinear fit model to determine the 50%  
809 effective concentration [EC<sub>50</sub>] titer. The EC<sub>50</sub> titer is the concentration (dilution) at which the  
810 antibody/serum at which you get 50% of your maximal effect (Optical Density).

811

### 812 **Zika neutralization assay**

813 A FRNT measured ZIKV neutralizing antibody was performed as previously described (65) .  
814 Briefly, heat-inactivated (56°C, 30minutes) sera were serially diluted (three-fold) starting at a  
815 1/30 dilution and incubated with 10<sup>2</sup> FFU of ZIKV (strain /PRVABC59/2015/P1 Vero) for 1  
816 hour at 37°C. The ZIKV-serum mixtures were added to Vero cell monolayers in 96-well plates  
817 (1.2  $\times$  10<sup>4</sup> Vero cells per well were seeded 16 hours prior to virus addition) and incubated for 1.5

818 h at 37°C, followed by overlaying the cells with 1% (w/v) methylcellulose in 1X DMEM  
819 (5%FBS). Cells were incubated for 40 hours at 37°C and subsequently fixed using 2% PFA in  
820 PBS for 1 hour at room temperature. Cells were permeabilized with Perm buffer (1X PBS, 5%  
821 FBS, 0.2% Triton X-100) for 20 minutes at 4°C and washed 3X with FACS buffer (1XPBS, 5%  
822 FBS, 0.05% Sodium azide). ZIKV-infected cell foci were detected using anti-Flavivirus E 4G2  
823 mouse

824 monoclonal     Antibody titre (IU/ml) = (antibody titre of standard serum)  $\times$   $\left( \frac{50\% \text{ RP of test serum}}{50\% \text{ RP of standard serum}} \right)$

825 onal  
826 antibody (1 $\mu$ g/mL), washed 3X with FACS buffer, followed by Cy3-conjugated Goat Anti-  
827 mouse IgG (Jackson ImmunoResearch, 2  $\mu$ g/mL). After 3X washes with FACS buffer and plates  
828 were read using a fluorescence microscope. For Figs 5, 6, and 7, the 1st International Standard  
829 for anti-Asian lineage Zika virus antibody (NIBSC: 16/352) and Working reagent for anti-Zika  
830 virus antibody (NIBSC: 16/320) were used at a starting dilution of 1:100. The 50% reduction  
831 point (RP -Reciprocal of the dilution where 50% neutralization is observed) for the serum and  
832 standards were noted, and the FRNT50 titer was calculated as follows:

833

834

### 835 **Measles neutralization assay**

836 Measles neutralization assay was performed as described previously (66) . Sera and the 3rd  
837 International standard for Anti-Measles serum were heat-inactivated at 56°C for 30 minutes. In a  
838 96 well plate, serum samples were diluted serially 4-fold from 1/10, and the 3rd International  
839 standard was diluted 1/100 in 1X DMEM (2% FBS, 1%PS) 70  $\mu$ l and mixed with 30  $\mu$ l volume  
840 of diluted virus solution (150 PFU/well ) of low-passage MV Edmonston strain (P1, Vero) in 1X

841 DMEM (2% FBS, 1% PS) on a plate shaker at 37°C for 1 h. Then,  $1.2 \times 10^4$  Vero cell suspension  
842 was added (100  $\mu$ l) and incubated for 68 hours at 37°C. Cells were fixed with 80% acetone for  
843 10  
844 min  
845 s at

$$\text{Antibody titre (mIU/ml)} = (\text{antibody titre of standard serum}) \times \left( \frac{50\% \text{ RP of test serum}}{50\% \text{ RP of standard serum}} \right)$$

846 4°C. The fixation solution was aspirated, and plates were allowed to air dry. Cells were blocked  
847 for 1 hour in FACS buffer and stained with 100 $\mu$ L of Anti MV-N cl25 mouse monoclonal  
848 antibody (2  $\mu$ g/mL in FACS buffer-1X PBS, 10% FBS, 0.05% sodium azide) for 2 hours. Plates  
849 were washed 3X with FACS buffer and stained with secondary antibody, Cy3-conjugated Goat  
850 Anti-mouse IgG (2  $\mu$ g/mL in FACS buffer) for 2 hours. After 3X washes with FACS buffer and  
851 plates were read using a fluorescence microscope, the presence of the measles virus was detected  
852 by direct EIA as described above. All serum dilutions were tested in triplicate. The 50%  
853 reduction point (50%RP) of each serum was calculated using the Reed–Muench formula. The  
854 neutralizing antibody titer of test sera was converted into mIU/ml by comparing their 50% RP  
855 with that of the international standard serum using the following formula:

856

857

### 858 **RNA extraction**

859 Whole blood (50  $\mu$ L) was resuspended in 150  $\mu$ L of TRIzol LS Reagent (Life Technologies). All  
860 Organs were added to Omni pre-filled bead tubes containing 1mL of TRIzol and homogenized  
861 using the OMNI bead raptor 12. The RNA extraction protocol for biological fluids using TRIzol  
862 LS Reagent was followed until the phase separation step. The remaining RNA extraction was

863 done using the PureLink RNA Mini Kit (Ambion). The quantity and quality (260/280 ratios) of  
864 RNA extracted was measured using NanoDrop (Fisher).

865

### 866 **Quantification of Zika virus RNA by quantitative Real-Time polymerase chain reaction**

867 ZIKV cDNA was generated from RNA isolated from the ZIKV African MR766 strain and Asian

868 PRVABC59 strain by One-Step RT PCR (SuperScript III, Thermo Fisher Scientific) with

869 primers ZKV NS4B IVT F1 (5'-

870 GAATTCTAATACGACTCACTATAGGGGCATCTAATGGGAAGG

871 AGA-3') and ZKV NS4B IVT R1 (5'-GCTAGCGGCTGTAGAGGAGTTCCAGTA-3'). The

872 African and Asian standards were generated by *in-vitro* transcription of the generated ZIKV

873 cDNA, followed by using the MEGAclear Transcription Clean-Up Kit. Aliquots of  $2 \times 10^{10}$

874 copies/ $\mu$ L were frozen at  $-80^{\circ}\text{C}$ . Five microliters of RNA per sample were run in triplicate, using

875 the ZIKV-F2 (5'-CAGCTGGCATCATGAAGAATC-3') and ZIKV-R1 (5'-

876 CACTTGTCCTCCATC

877 TTCTTCTCC-3') primers for African strain detection (ThermoFisher SCIENTIFIC) or the

878 ZIKV-F1 (5'-CAGCTGGCATCATGAAGAACC-3') and ZIKV-R2 (5'-

879 CACCTGTCCCATCTTTTTC

880 TCC-3') primers for Asian strain detection. The panZika-Probe (6FAMGTTGTGGATGGAATA

881 GTGGMGBFNQ) detects both the Asian and the African strain.

882

### 883 **ELISPOT**

884 An ELISPOT assay quantitated the number of ZIKV E, ZIKV-NS1, and MV-H specific LLPCs

885 and SLPCs in the bone marrow and spleen, respectively, as previously described (67). ELISPOT

886 plates (Millipore) were coated with ZIKV-E antigen (50 µg/mL), ZIKV-NS1 antigen (50 µg/mL)  
887 and MV-H antigen (10 µg/mL), overnight at 4°C. Subsequently, plates were washed six times  
888 with PBS (200 µl) and then blocked for 1-2 hours with Goat Serum (ThermoFisher Scientific,  
889 16210072) at 37°C. Bone marrow cells from the femurs and splenocytes were harvested from the  
890 immunized mice and controls, and erythrocytes were lysed by ACK lysis buffer. Subsequently, 3  
891  $\times 10^6$  cells/well were added to the ZIKV-E, and ZIKV-NS1 coated plates, and 1  $\times 10^6$  cells/well  
892 were added to the MV-H coated plates. Cells were serially diluted in a 96 well round bottom  
893 plate, transferred to the coated ELISPOT plate, and incubated overnight at 37°C in a CO<sub>2</sub>  
894 incubator for 16 hours. Plates were washed four times with 1X PBST, incubated with HRP  
895 conjugated goat anti-mouse IgG-Fc (Sothorn Biotech, 1µg/mL) in PBS-T for 2 hours at 37°C.  
896 Following 3X washing with 1X PBST, plates were washed 3X with PBS. Spots were developed  
897 with TrueBlue peroxidase substrate (KPL) before the reaction was quenched with water and  
898 counted with an AID EliSpot Reader (Autoimmun Diagnostika GmbH).

899

## 900 **Statistical analysis**

901 Specific statistical tests used to analyze experimental datasets are described in the respective Fig.  
902 Legends. For experiments with only female mice, antibody responses, and immune cell analyses,  
903 One-way ANOVA with posthoc Tukey HSD test was performed on log-transformed data for  
904 each time point. For data analysis where only two groups were compared, a Mann-Whitney U  
905 test was performed on log-transformed data for each time point. For experiments with female  
906 and male mice, antibody responses, and immune cell analyses, two-way ANOVA with posthoc  
907 Tukey HSD test was performed on log-transformed data for each time point. Survival curves

908 were analyzed using the log-rank test with a Bonferroni correction. A P value of  $< 0.05$  was  
909 assigned to establish statistical significance using GraphPad Prism version 8.0.

## References

1. G. Calvet *et al.*, Detection and sequencing of Zika virus from amniotic fluid of fetuses with microcephaly in Brazil: a case study. *Lancet Infect Dis* **16**, 653-660 (2016).
2. B. Valle Borrego, K. Kosanic, F. de Ory, F. J. Merino Fernandez, B. Gomez Rodriguez, [Zika virus infection acquired through sexual contact: first documented case of local transmission in Spain]. *Emergencias* **29**, 290-291 (2017).
3. Q. Zhang *et al.*, Spread of Zika virus in the Americas. *Proc Natl Acad Sci U S A* **114**, E4334-E4343 (2017).
4. L. M. Araujo, M. L. Ferreira, O. J. Nascimento, Guillain-Barre syndrome associated with the Zika virus outbreak in Brazil. *Arq Neuropsiquiatr* **74**, 253-255 (2016).

5. T. C. Pierson, B. S. Graham, Zika Virus: Immunity and Vaccine Development. *Cell* **167**, 625-631 (2016).
6. D. Sirohi *et al.*, The 3.8 Å resolution cryo-EM structure of Zika virus. *Science* **352**, 467-470 (2016).
7. A. Wang, S. Thurmond, L. Islas, K. Hui, R. Hai, Zika virus genome biology and molecular pathogenesis. *Emerg Microbes Infect* **6**, e13 (2017).
8. X. Xu *et al.*, Contribution of intertwined loop to membrane association revealed by Zika virus full-length NS1 structure. *EMBO J* **35**, 2170-2178 (2016).
9. R. Hilgenfeld, Zika virus NS1, a pathogenicity factor with many faces. *EMBO J* **35**, 2631-2633 (2016).
10. K. A. Dowd *et al.*, Broadly Neutralizing Activity of Zika Virus-Immune Sera Identifies a Single Viral Serotype. *Cell Rep* **16**, 1485-1491 (2016).
11. W. Sornjai, S. Ramphan, N. Wikan, P. Auewarakul, D. R. Smith, High correlation between Zika virus NS1 antibodies and neutralizing antibodies in selected serum samples from normal healthy Thais. *Sci Rep* **9**, 13498 (2019).
12. L. Yu *et al.*, Delineating antibody recognition against Zika virus during natural infection. *JCI Insight* **2**, (2017).
13. M. J. Bailey *et al.*, Antibodies Elicited by an NS1-Based Vaccine Protect Mice against Zika Virus. *MBio* **10**, (2019).
14. T. Hampton, DNA Vaccine Protects Monkeys Against Zika Virus Infection. *JAMA* **316**, 1755 (2016).
15. K. A. Dowd *et al.*, Rapid development of a DNA vaccine for Zika virus. *Science* **354**, 237-240 (2016).
16. M. S. Diamond, J. E. Ledgerwood, T. C. Pierson, Zika Virus Vaccine Development: Progress in the Face of New Challenges. *Annu Rev Med* **70**, 121-135 (2019).
17. G. A. Poland, I. G. Ovsyannikova, R. B. Kennedy, Zika Vaccine Development: Current Status. *Mayo Clin Proc* **94**, 2572-2586 (2019).
18. M. R. Gaudinski *et al.*, Safety, tolerability, and immunogenicity of two Zika virus DNA vaccine candidates in healthy adults: randomised, open-label, phase 1 clinical trials. *Lancet* **391**, 552-562 (2018).
19. P. Tebas *et al.*, Safety and Immunogenicity of an Anti-Zika Virus DNA Vaccine - Preliminary Report. *N Engl J Med*, (2017).



20. K. Modjarrad *et al.*, Preliminary aggregate safety and immunogenicity results from three trials of a purified inactivated Zika virus vaccine candidate: phase 1, randomised, double-blind, placebo-controlled clinical trials. *Lancet* **391**, 563-571 (2018).
21. C. Lopez-Camacho *et al.*, Assessment of Immunogenicity and Efficacy of a Zika Vaccine Using Modified Vaccinia Ankara Virus as Carriers. *Pathogens* **8**, (2019).
22. P. Perez *et al.*, A Vaccine Based on a Modified Vaccinia Virus Ankara Vector Expressing Zika Virus Structural Proteins Controls Zika Virus Replication in Mice. *Sci Rep* **8**, 17385 (2018).
23. A. C. Brault *et al.*, A Zika Vaccine Targeting NS1 Protein Protects Immunocompetent Adult Mice in a Lethal Challenge Model. *Sci Rep* **7**, 14769 (2017).
24. J. M. Richner *et al.*, Vaccine Mediated Protection Against Zika Virus-Induced Congenital Disease. *Cell* **170**, 273-283 e212 (2017).
25. K. K. A. Van Rompay *et al.*, DNA vaccination before conception protects Zika virus-exposed pregnant macaques against prolonged viremia and improves fetal outcomes. *Sci Transl Med* **11**, (2019).
26. R. A. Larocca *et al.*, Adenovirus Vector-Based Vaccines Confer Maternal-Fetal Protection against Zika Virus Challenge in Pregnant IFN- $\alpha$  (R-/-) Mice. *Cell Host Microbe* **26**, 591-600 e594 (2019).
27. C. Verheust, M. Goossens, K. Pauwels, D. Breyer, Biosafety aspects of modified vaccinia virus Ankara (MVA)-based vectors used for gene therapy or vaccination. *Vaccine* **30**, 2623-2632 (2012).
28. WHO;, in *WHO Weekly Epidemiological Record of 12 July 2019*. (2019).
29. A. Suy *et al.*, Prolonged Zika Virus Viremia during Pregnancy. *N Engl J Med* **375**, 2611-2613 (2016).
30. D. E. Griffin, Measles Vaccine. *Viral Immunol* **31**, 86-95 (2018).
31. A. P. Fiebelkorn *et al.*, Measles Virus Neutralizing Antibody Response, Cell-Mediated Immunity, and Immunoglobulin G Antibody Avidity Before and After Receipt of a Third Dose of Measles, Mumps, and Rubella Vaccine in Young Adults. *J Infect Dis* **213**, 1115-1123 (2016).
32. S. A. Rasmussen, D. J. Jamieson, What Obstetric Health Care Providers Need to Know About Measles and Pregnancy. *Obstet Gynecol* **126**, 163-170 (2015).
33. . (2019).

34. R. R. Marty, M. C. Knuchel, T. N. Morin, H. Y. Naim, An immune competent mouse model for the characterization of recombinant measles vaccines. *Hum Vaccin Immunother* **11**, 83-90 (2015).
35. M. Mura *et al.*, hCD46 receptor is not required for measles vaccine Schwarz strain replication in vivo: Type-I IFN is the species barrier in mice. *Virology* **524**, 151-159 (2018).
36. K. E. Stephenson *et al.*, Safety and immunogenicity of a Zika purified inactivated virus vaccine given via standard, accelerated, or shortened schedules: a single-centre, double-blind, sequential-group, randomised, placebo-controlled, phase 1 trial. *Lancet Infect Dis* **20**, 1061-1070 (2020).
37. J. L. Slon Campos *et al.*, DNA-immunisation with dengue virus E protein domains I/II, but not domain III, enhances Zika, West Nile and Yellow Fever virus infection. *PLoS One* **12**, e0181734 (2017).
38. A. P. S. Rathore, W. A. A. Saron, T. Lim, N. Jahan, A. L. St John, Maternal immunity and antibodies to dengue virus promote infection and Zika virus-induced microcephaly in fetuses. *Sci Adv* **5**, eaav3208 (2019).
39. S. Gupta *et al.*, The Neonatal Fc receptor (FcRn) enhances human immunodeficiency virus type 1 (HIV-1) transcytosis across epithelial cells. *PLoS Pathog* **9**, e1003776 (2013).
40. M. G. Zimmerman *et al.*, Cross-Reactive Dengue Virus Antibodies Augment Zika Virus Infection of Human Placental Macrophages. *Cell Host Microbe* **24**, 731-742 e736 (2018).
41. A. Gordon *et al.*, Prior dengue virus infection and risk of Zika: A pediatric cohort in Nicaragua. *PLoS Med* **16**, e1002726 (2019).
42. P. Pantoja *et al.*, Zika virus pathogenesis in rhesus macaques is unaffected by pre-existing immunity to dengue virus. *Nat Commun* **8**, 15674 (2017).
43. S. Tripathi *et al.*, A novel Zika virus mouse model reveals strain specific differences in virus pathogenesis and host inflammatory immune responses. *PLoS Pathog* **13**, e1006258 (2017).
44. G. Young *et al.*, Complete Protection in Macaques Conferred by Purified Inactivated Zika Vaccine: Defining a Correlate of Protection. *Sci Rep* **10**, 3488 (2020).
45. A. O. Hassan *et al.*, A Gorilla Adenovirus-Based Vaccine against Zika Virus Induces Durable Immunity and Confers Protection in Pregnancy. *Cell Rep* **28**, 2634-2646 e2634 (2019).
46. C. Shan *et al.*, A single-dose live-attenuated vaccine prevents Zika virus pregnancy transmission and testis damage. *Nat Commun* **8**, 676 (2017).

47. J. L. Slon-Campos *et al.*, A protective Zika virus E-dimer-based subunit vaccine engineered to abrogate antibody-dependent enhancement of dengue infection. *Nat Immunol* **20**, 1291-1298 (2019).
48. M. J. Bailey *et al.*, Human antibodies targeting Zika virus NS1 provide protection against disease in a mouse model. *Nat Commun* **9**, 4560 (2018).
49. B. Grubor-Bauk *et al.*, NS1 DNA vaccination protects against Zika infection through T cell-mediated immunity in immunocompetent mice. *Sci Adv* **5**, eaax2388 (2019).
50. J. Emanuel *et al.*, A VSV-based Zika virus vaccine protects mice from lethal challenge. *Sci Rep* **8**, 11043 (2018).
51. A. Li *et al.*, A Zika virus vaccine expressing premembrane-envelope-NS1 polyprotein. *Nat Commun* **9**, 3067 (2018).
52. R. A. Larocca *et al.*, Vaccine protection against Zika virus from Brazil. *Nature* **536**, 474-478 (2016).
53. H. Garg, M. Sedano, G. Plata, E. B. Punke, A. Joshi, Development of Virus-Like-Particle Vaccine and Reporter Assay for Zika Virus. *J Virol* **91**, (2017).
54. K. Xu *et al.*, Recombinant Chimpanzee Adenovirus Vaccine AdC7-M/E Protects against Zika Virus Infection and Testis Damage. *J Virol* **92**, (2018).
55. B. W. Jagger *et al.*, Protective Efficacy of Nucleic Acid Vaccines Against Transmission of Zika Virus During Pregnancy in Mice. *J Infect Dis* **220**, 1577-1588 (2019).
56. J. R. Keeffe *et al.*, A Combination of Two Human Monoclonal Antibodies Prevents Zika Virus Escape Mutations in Non-human Primates. *Cell Rep* **25**, 1385-1394 e1387 (2018).
57. C. Nurnberger, B. S. Bodmer, A. H. Fiedler, G. Gabriel, M. D. Muhlebach, A Measles Virus-Based Vaccine Candidate Mediates Protection against Zika Virus in an Allogeneic Mouse Pregnancy Model. *J Virol* **93**, (2019).
58. C. Shan *et al.*, Maternal vaccination and protective immunity against Zika virus vertical transmission. *Nat Commun* **10**, 5677 (2019).
59. D. F. Robbiani *et al.*, Risk of Zika microcephaly correlates with features of maternal antibodies. *J Exp Med* **216**, 2302-2315 (2019).
60. D. F. Robbiani *et al.*, Recurrent Potent Human Neutralizing Antibodies to Zika Virus in Brazil and Mexico. *Cell* **169**, 597-609 e511 (2017).
61. M. Hassert, M. G. Harris, J. D. Brien, A. K. Pinto, Identification of Protective CD8 T Cell Responses in a Mouse Model of Zika Virus Infection. *Front Immunol* **10**, 1678 (2019).

62. M. Hassert *et al.*, CD4+T cells mediate protection against Zika associated severe disease in a mouse model of infection. *PLoS Pathog* **14**, e1007237 (2018).
63. I. G. Ovsyannikova, N. Dhiman, R. M. Jacobson, R. A. Vierkant, G. A. Poland, Frequency of measles virus-specific CD4+ and CD8+ T cells in subjects seronegative or highly seropositive for measles vaccine. *Clin Diagn Lab Immunol* **10**, 411-416 (2003).
64. C. Shan *et al.*, An Infectious cDNA Clone of Zika Virus to Study Viral Virulence, Mosquito Transmission, and Antiviral Inhibitors. *Cell Host Microbe* **19**, 891-900 (2016).
65. H. Zhao *et al.*, Structural Basis of Zika Virus-Specific Antibody Protection. *Cell* **166**, 1016-1027 (2016).
66. M. S. Lee, B. Cohen, J. Hand, D. J. Nokes, A simplified and standardized neutralization enzyme immunoassay for the quantification of measles neutralizing antibody. *J Virol Methods* **78**, 209-217 (1999).
67. H. B. Shah, K. A. Koelsch, B-Cell ELISPOT: For the Identification of Antigen-Specific Antibody-Secreting Cells. *Methods Mol Biol* **1312**, 419-426 (2015).

## Acknowledgments

**General:** We thank Jennifer Wilson (Thomas Jefferson University, Philadelphia, PA) for critical reading and editing the manuscript; Dr. Christian Pfaller and Dr. Roberto Cattaneo for providing the MV-GFP0 plasmid, measles H antibody, and measles titration protocols; Dr. Glenn Rall for providing the measles helper plasmids; Dr. André Lieber for transferring the *hCD46* *IFN $\alpha$  $\beta$ R*<sup>-/-</sup> mice; Dr. Gene Tan for providing the human NS1 antibody; and Annamarie Testa for assisting in some experimental work. **Author Contributions:** D.K and M.J.S. designed the studies and wrote the paper. D.K performed and analyzed all experiments. C.W provided the

modified measles vaccine vector, the measles GFP-Nluciferase2 plasmid, and the MV-E-NS1(6) plasmid. **Competing interests:** All authors declare that they have no competing interests. **Data and materials availability:** All data generated from this study are present in the paper or Supplementary Materials. Vaccines and Reagents can be shared with a standard material transfer agreement upon request to the corresponding author, Matthias J. Schnell.

910 **Figures**

911 **Fig. 1. Generation and characterization of first-generation MV-based candidate ZIKV**  
912 **vaccines.**

913

914 **(A)** MV-ZIKV vaccine constructs and controls.

915

916 **(B)** Immunofluorescence staining of Vero cells was infected at MOI-0.1 for 72 hours with the  
917 recovered MV-ZIKV candidate vaccines and control viruses. The permeabilized cells were  
918 stained for MV using an  $\alpha$ -MV nucleoprotein mouse monoclonal and for the ZIKV-E using a  
919 mouse monoclonal antibody. The MV-N antibody is conjugated with a Dylight 488 (green color  
920 changed to **Yellow** for visualization) fluorophore, and ZIKV-E is stained with a secondary goat  
921  $\alpha$ -mouse Cy-3 (red color changed to **Cyan** for visualization) antibody. Confocal images were  
922 taken using NIKON-A1R, 60X magnification, 3X zoom. The scale bar measures 30  $\mu$ m.

923

924 **(C)** Sucrose-purified virions were analyzed on SDS-PAGE (10%) stained with SYPRO Ruby.  
925 Zika virus PRVABC59 strain was loaded as the control.

926

927 **(D)** Western blot analysis of sucrose-purified virions probed for ZIKV-E and MV-H. Zika virus  
928 PRVABC59 strain was loaded as the control.

929

930 **(E)** Western blot analysis of cell lysates of VERO cells infected with MV-ZIKV candidate  
931 vaccine at MOI-5 for 60 hours. Zika virus PRVABC59 infected cell lysates were loaded as the  
932 control. The blot was probed for ZIKV-E and MV-N.

933 **Fig. 2. Immunogenicity and efficacy testing of first-generation candidate MV-ZIKV**  
934 **vaccines using a lethal ZIKV African MR766 challenge strain.**

935

936 **(A)** Timeline of vaccination, challenge, and viral load determinations.

937

938 **(B-C)** anti-ZIKV-E-specific (B), and anti-MV-H specific (C) ELISA  $EC_{50}$  titers of the  
939 vaccinated animals are plotted on a graph for all animals at different time points. The Mean  $\pm$  SD  
940 is depicted per group.

941

942 **(D & I)** ZIKV neutralization with PRVABC59 Asian strain. FRNT was performed on day 104  
943 (D) and necropsy (I) sera from vaccinated animals and controls. The 50% neutralizing titer  
944 (FRNT<sub>50</sub>) is plotted on the graph. The Mean  $\pm$  SD is depicted per group.

945

946 **(E)** Kaplan-Meier survival curve analysis of vaccinated and control animals post challenge.

947

948 **(F-H)** ZIKV RNA copies by quantitative polymerase chain reaction (qPCR) in the blood (F),  
949 brain (G), and reproductive tract (H). The Mean  $\pm$  SD is depicted per group.

950

951 Statistics for Fig. 2B-D & F-I were done using the two-way ANOVA with posthoc Tukey HSD test and performed  
952 on log-transformed data for each time point. Fig. 2E, Survival curves were analyzed using the log-rank test with a  
953 Bonferroni correction. Only significant differences are depicted. P-value of 0.12(ns), 0.033(\*), 0.002(\*\*),  
954 <0.001(\*\*\*) are depicted accordingly. A horizontal line ( ) is used to include all groups below it.

955 **Fig. 3. Generation and characterization of second-generation MV-based candidate ZIKV**  
956 **vaccines.**

957

958 **(A)** Second-generation vaccine constructs

959

960 **(B)** Immunofluorescence staining of Vero cells was infected at MOI-0.1 for 72 hours with the  
961 recovered modified MV-ZIKV candidate vaccines and control viruses. The permeabilized cells  
962 were stained for MV using an  $\alpha$ -MV N protein mouse monoclonal conjugated with dylight488  
963 (green color changed to **Yellow** for visualization), for the ZIKV-E using a mouse monoclonal  
964 antibody, and for ZIKV NS1 using human monoclonal antibody EB9. ZIKV-E is stained with a  
965 secondary  $\alpha$ -mouse AF568 (red color changed to **Cyan** for visualization) antibody, and ZIKV-  
966 NS1 is stained with a secondary goat  $\alpha$ -human AF-647 (far-red color changed to **Magenta** for  
967 visualization) antibody. Confocal images were taken using NIKON-A1R, 60X magnification,  
968 2.5X zoom. The scale bar measures 30  $\mu$ m.

969

970 **(C)** Sucrose-purified virions were analyzed on SDS-PAGE (10%) stained with SYPRO Ruby.  
971 Zika virus PRVABC59 was loaded with the control virus

972

973 **(D)** Western blot analysis of sucrose purified virions probed for ZIKV-E and MV-H. Zika virus  
974 PRVABC59 was loaded as the control virus.

975



976 (E) Western blot analysis of cell lysates of Vero cells infected with the MV-ZIKV candidate  
977 vaccine at MOI-5. Zika virus PRVABC59 infected cell lysates were loaded as the control. The  
978 blot was probed for ZIKV-E, ZIKV-NS1, and MV-N.

979 **Fig. 4. Immunogenicity and efficacy testing of second-generation candidate MV-ZIKV**  
980 **vaccines using a lethal ZIKV African MR766 challenge strain.**

981

982 **(A)** Timeline of vaccination, challenge, and viral load determinations.

983

984 **(B-D)** anti-ZIKV-E (B), anti- ZIKV-NS1 (C), and anti-MV-H (D) ELISA EC<sub>50</sub> titers of the  
985 vaccinated animals are plotted on a graph for all animals at different time points. The Mean  $\pm$  SD  
986 is depicted per group.

987

988 **(E & J)** ZIKV neutralization with PRVABC59 Asian strain. FRNT was performed on day 49 (E)  
989 and necropsy (J) sera from vaccinated animals and controls. The 50% neutralizing titer (FRNT<sub>50</sub>)  
990 is plotted on the graph in terms of IU/mL. The Mean  $\pm$  SD is depicted per group.

991

992 **(F)** Kaplan-Meier survival curve analysis of vaccinated and control animals post challenge.

993

994 **(G-I)** ZIKV RNA copies by qPCR in the blood (G), brain (H), and reproductive tract (I). The  
995 Mean  $\pm$  SD is depicted per group.

996

997 Statistics for Fig. 4B-E, G-J were done using the one-way ANOVA with posthoc Tukey HSD test and performed on  
998 log-transformed data for each time point. Fig. 4E, Survival curves were analyzed using the log-rank test with a  
999 Bonferroni correction. Only significant differences are depicted. P-value of 0.12(ns), 0.033(\*), 0.002(\*\*),  
1000 <0.001(\*\*\*) are depicted accordingly. LOD stands for limit of detection. A horizontal line ( ) is used to  
1001 include all groups below it.

1002 **Fig. 5. Long-lived and short-lived plasma cell response induced by the combination vaccine,**  
1003 **MV-E2, and MV-NS1(2).**

1004

1005 **(A)** Timeline of vaccination, bone-marrow, and spleen harvesting.

1006

1007 **(B-D)** anti-ZIKV-E (B), anti- ZIKV-NS1 (C), and anti-MV-H (D) ELISA EC<sub>50</sub> titers of the  
1008 vaccinated animals are plotted on a graph for all animals at different time points. The Mean  $\pm$  SD  
1009 is depicted per group.

1010

1011 **(E)** MV Neutralization with low-passage MV Edmonston strain. Nt-EIA assay was performed on  
1012 necropsy sera from vaccinated animals and controls. The 50% neutralizing titer (Nt-EIA titre) is  
1013 plotted on the graph in terms of mIU/mL. The Mean  $\pm$  SD is depicted per group.

1014

1015 **(F)** ZIKV Neutralization with PRVABC59 Asian strain. FRNT was performed on necropsy sera  
1016 from vaccinated animals and controls. The 50% neutralizing titer (FRNT<sub>50</sub>) is plotted on the  
1017 graph in terms of IU/mL. The Mean  $\pm$  SD is depicted per group.

1018

1019 **(G-I)** ZIKV-E specific (G), ZIKV-NS1 specific (H), and MV-H specific (I) long-lived and short-  
1020 lived plasma cell responses. The Mean  $\pm$  SD is depicted per group.

1021

1022 Statistics for Fig. 5B-I were done using the one-way ANOVA with posthoc Tukey HSD test and performed on log-  
1023 transformed data for each time point. P-value of 0.12(ns), 0.033(\*), 0.002(\*\*), <0.001(\*\*\*) are depicted  
1024 accordingly.

1025 **Fig. 6. Immunogenicity and efficacy testing of the combination vaccine, MV-E2, and MV-**  
1026 **NS1(2), using a lethal ZIKV African MR766, challenge strain in a pregnant mouse model.**

1027

1028 (A) Timeline of vaccination, super-ovulation, and challenge. The mice depicted as black-  
1029 outlined blue inverted triangles ( ) are the pregnant mice in the combination group.

1030

1031 (B-D) anti-ZIKV-E (B), anti- ZIKV-NS1 (C), and anti-MV-H (D) ELISA EC<sub>50</sub> titers of the  
1032 vaccinated animals are plotted on a graph for all animals at different time points. The Mean ± SD  
1033 is depicted per group.

1034

1035 (E & H) FRNT assay with PRVABC59 Asian strain was performed on day 28 (E) and Necropsy  
1036 (H) sera. The 50% neutralizing titer (FRNT<sub>50</sub>) is plotted on the graph in terms of IU/mL. The  
1037 Mean ± SD is depicted per group.

1038

1039 (F-G) ZIKV RNA copies by qPCR in the blood, brain, and placenta of the pregnant mice (F) in  
1040 the fetal head (G). Inset (G) percentage of resorbed and intact fetuses per group. The Mean ± SD  
1041 is depicted per group.

1042

1043 Statistics for Fig. 6E-H were done using the one-way ANOVA with posthoc Tukey HSD test and performed on log-  
1044 transformed data for each time point. Only significant differences are depicted. P-value of 0.12(ns), 0.033(\*),  
1045 0.002(\*\*), <0.001(\*\*\*) are depicted accordingly. LOD stands for limit of detection. A horizontal line (—) is  
1046 used to include all groups below it.

1047 **Supplementary Materials:**

1048 **Fig. S1. Complete nucleotide and translation sequence of the ZIKV prME antigen.**

1049

1050 **Fig. S2. Immunogenicity and efficacy testing of first-generation candidate MV-ZIKV**  
1051 **vaccines using a non-lethal ZIKV Asian PRVABC59 challenge strain.**

1052

1053 (A) Timeline of vaccination, challenge, and viral load determinations.

1054

1055 (B-C) Anti-ZIKV-E (B) and anti-MV-H (C) specific ELISA EC<sub>50</sub> titers of the vaccinated  
1056 animals are plotted on a graph for all animals at different time points. The Mean ± SD is depicted  
1057 per group.

1058

1059 (D & H) ZIKV neutralization with PRVABC59 Asian strain. FRNT assay was performed on day  
1060 63 (D) and necropsy (H) sera from vaccinated animals and controls. The 50% neutralizing titer  
1061 (FRNT<sub>50</sub>) is plotted on the graph. The Mean ± SD is depicted per group.

1062

1063 (E-G) ZIKV RNA copies by qPCR in the blood (E), brain (F), and reproductive tract (G). The  
1064 Mean ± SD is depicted per group.

1065

1066 Statistics for Fig. S1B-C was done using the Mann-Whitney U test and performed on log-transformed data for each  
1067 time point. Statistics for Fig. S1D-H was done using the one-way ANOVA with a posthoc Tukey HSD test and  
1068 performed on log-transformed data for each time point. Only significant differences are depicted. P-value of  
1069 0.12(ns), 0.033(\*), 0.002(\*\*), <0.001(\*\*\*) are depicted accordingly. LOD stands for limit of detection. A horizontal  
1070 line ( ) is used to include all groups below it.

1071 **Fig. S3. Long-term immunogenicity and efficacy testing of first-generation candidate MV-**  
1072 **ZIKV vaccines using a lethal ZIKV African MR766 challenge strain.**

1073

1074 (A) Timeline of vaccination, challenge, and viral load determinations.

1075

1076 (B-C) Anti-ZIKV-E (B) and anti-MV-H (C) specific ELISA EC<sub>50</sub> titers of the vaccinated  
1077 animals are plotted on a graph for all animals at different time points. The Mean ± SD is depicted  
1078 per group.

1079

1080 (D & I) FRNT assay was performed on day 144 (D) and necropsy (I) sera from vaccinated  
1081 animals and controls. The 50% neutralizing titer (FRNT<sub>50</sub>) is plotted on the graph. The Mean ±  
1082 SD is depicted per group.

1083

1084 (E) Kaplan-Meier survival curve analysis of vaccinated and control animals post challenge.

1085

1086 (F-H) ZIKV RNA copies by quantitative polymerase chain reaction (qPCR) in the blood (F),  
1087 brain (G), and reproductive tract (H). The Mean± SD is depicted per group.

1088

1089 Statistics for Fig. S2: B-D & F-I were done using the one-way ANOVA with posthoc Tukey HSD test and  
1090 performed on log-transformed data for each time point. Fig. S2E survival curves were analyzed using the log-rank  
1091 test with a Bonferroni correction. Only significant differences are depicted. P-value of 0.12(ns), 0.033(\*), 0.002(\*\*),  
1092 <0.001(\*\*\*) are depicted accordingly. A horizontal line ( ) is used to include all groups below it.

1093 **Fig. S4. Effect of intramuscular route of vaccination and prior MV immunity to the**  
1094 **immunogenicity and efficacy of first-generation candidate MV-ZIKV vaccines using a**  
1095 **lethal ZIKV African MR766 challenge strain.**

1096

1097 (A) Timeline of vaccination, challenge, and viral load determinations. The black boxed open  
1098 pink triangle  is the MV-E0(M) animal that succumbed to ZIKV disease.

1099

1100 (B-C) Anti-ZIKV-E (B) and anti-MV-H (C) specific ELISA EC<sub>50</sub> titers of the vaccinated  
1101 animals are plotted on a graph for all animals at different time points. The Mean ± SD is depicted  
1102 per group.

1103

1104 (D & I) FRNT assay was performed on day 63 (D) and necropsy (I) sera. The 50% neutralizing  
1105 titer (FRNT<sub>50</sub>) is plotted on the graph. The Mean ± SD is depicted per group.

1106

1107 (E) Kaplan-Meier survival curve analysis of vaccinated and control animals post challenge.

1108

1109 (F-H) ZIKV RNA copies by qPCR in the blood (F), brain (G), and reproductive tract (H) at  
1110 necropsy. The Mean ± SD is depicted per group.

1111

1112 Statistics for Fig. S3: B-D & F-I were done using the two-way ANOVA with posthoc Tukey HSD test and  
1113 performed on log-transformed data for each time point. Fig. S3E survival curves were analyzed using the log-rank

1114 test with a Bonferroni correction. Only significant differences are depicted. P-value of 0.12(ns), 0.033(\*), 0.002(\*\*),  
1115 <0.001(\*\*\*) are depicted accordingly. A horizontal line ( ) is used to include all groups below it.

1116 **Fig. S5. Complete nucleotide and translation sequence of ZIKV prME-NS1 antigen.**

1117

1118 **Fig. S6. Complete nucleotide and translation sequence of ZIKV NS1 antigen.**

1119

1120 **Fig. S7. Multi-step growth curves.**

1121

1122 **Fig S8: Subviral particle characterization**

1123 (A) Western blot of sucrose purified SVPs probed for ZIKV-E

1124 (B) Western blot of sucrose purified SVPs probed for ZIKV-NS1

1125

1126 **Fig. S9. Complete nucleotide and translation sequence of codon optimized MV-H**

1127 **(Edmonston B strain) antigen.**



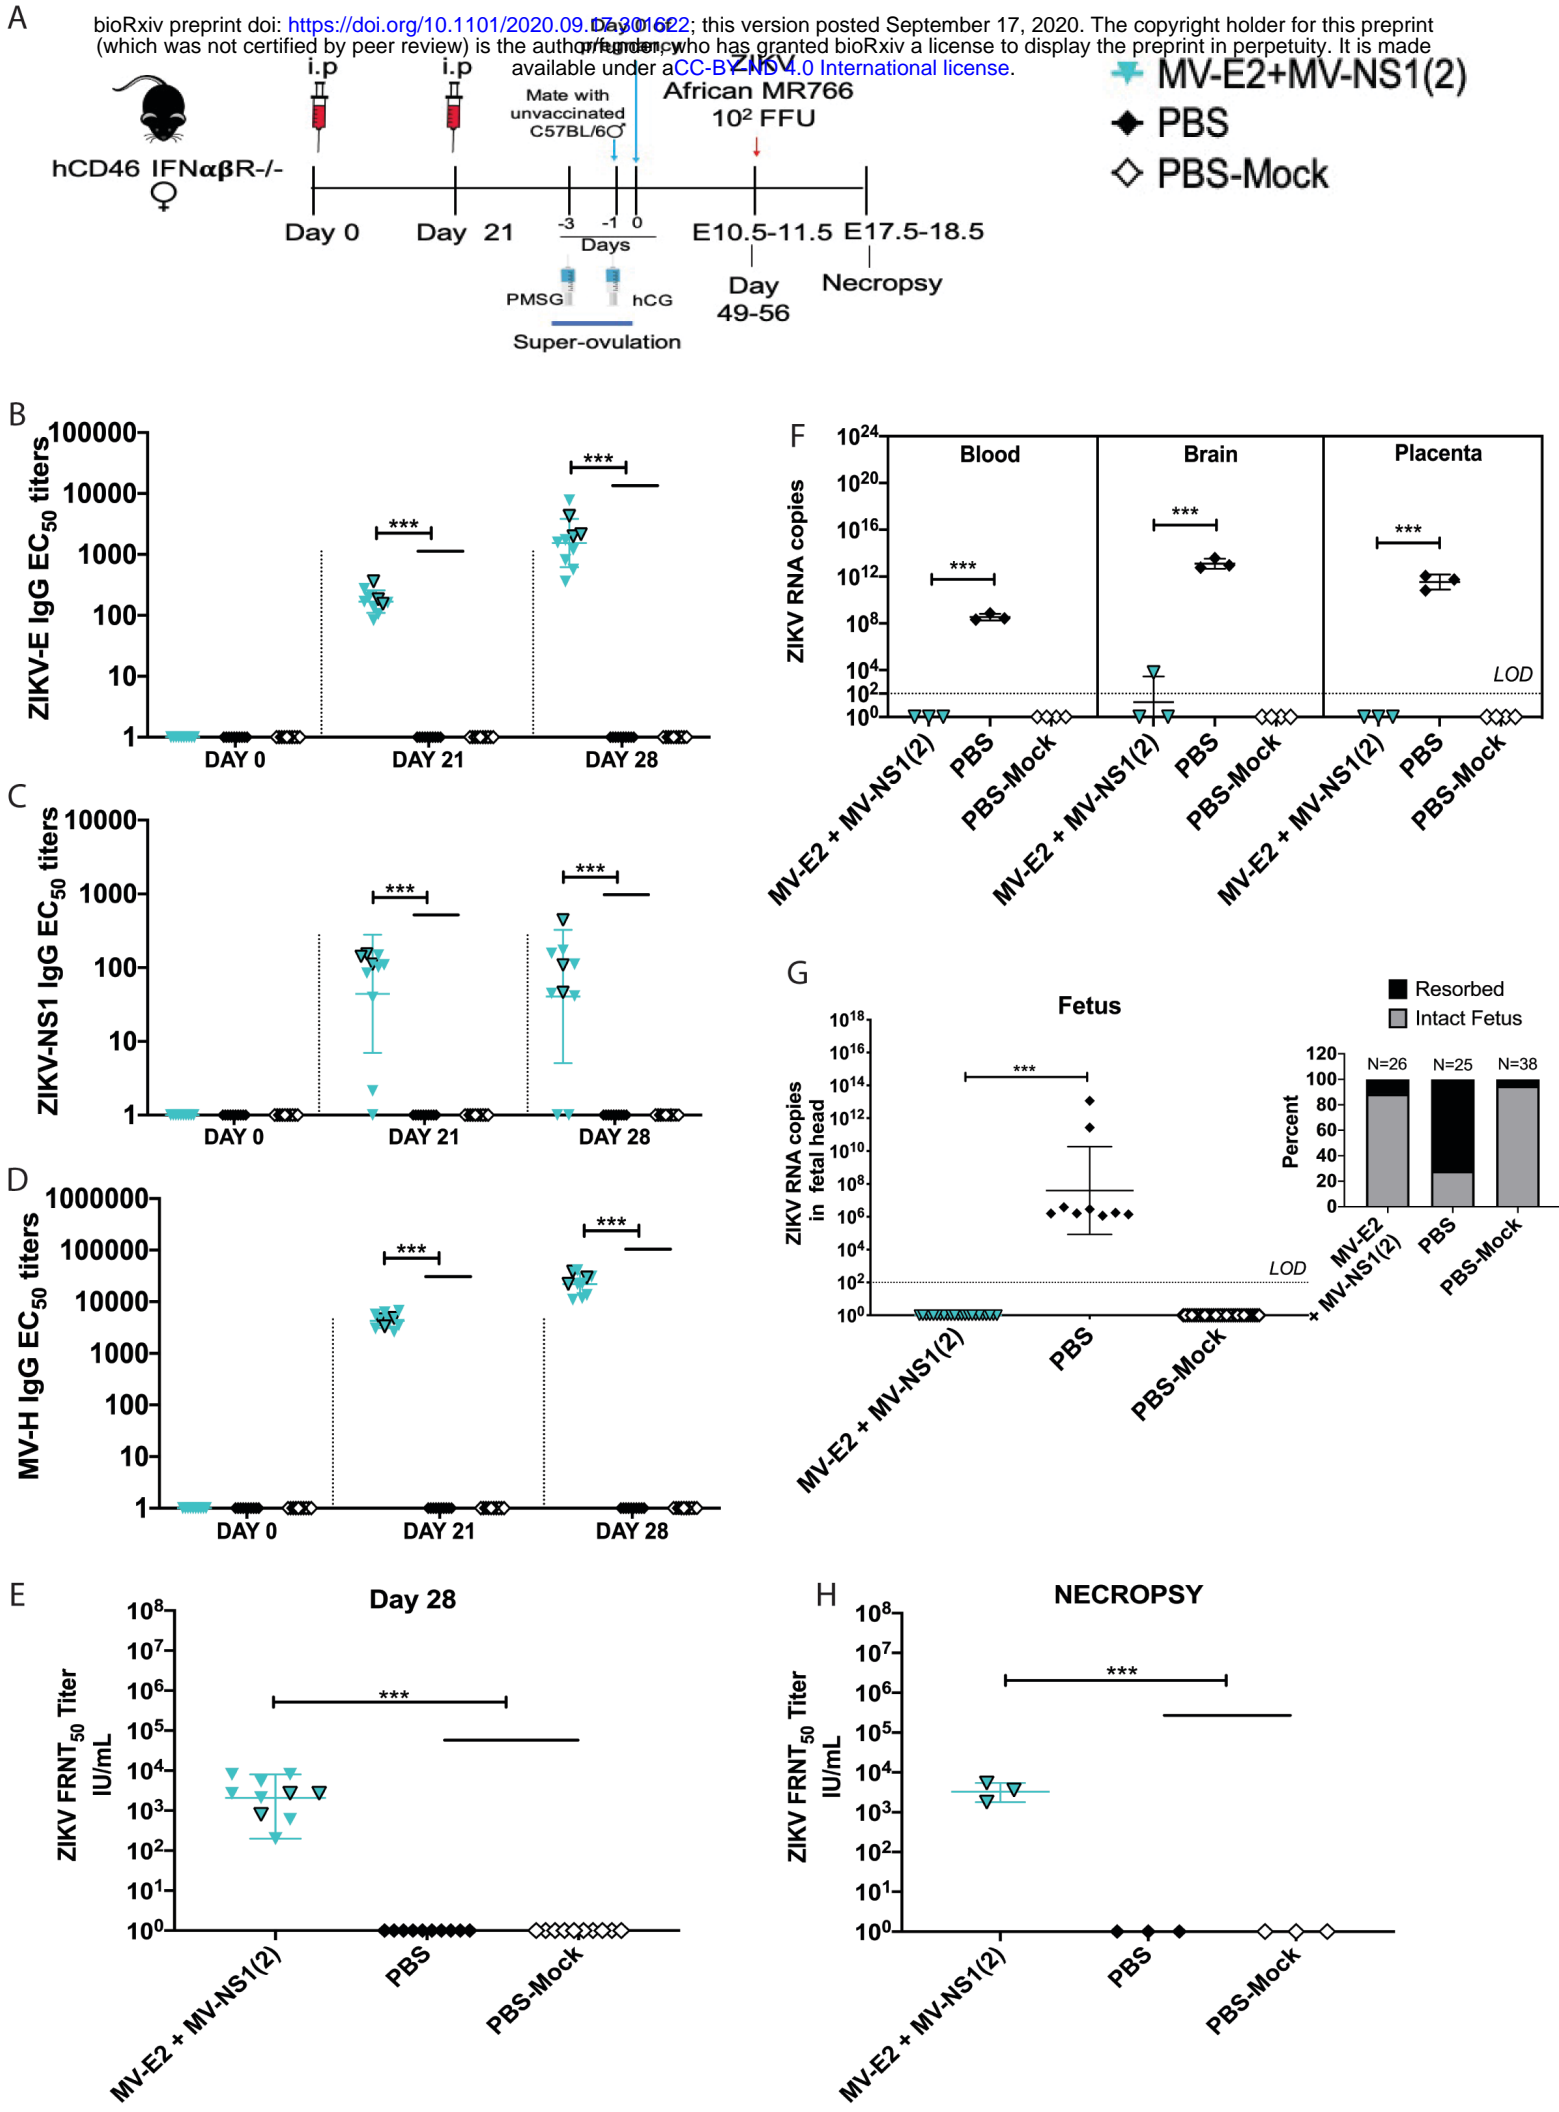

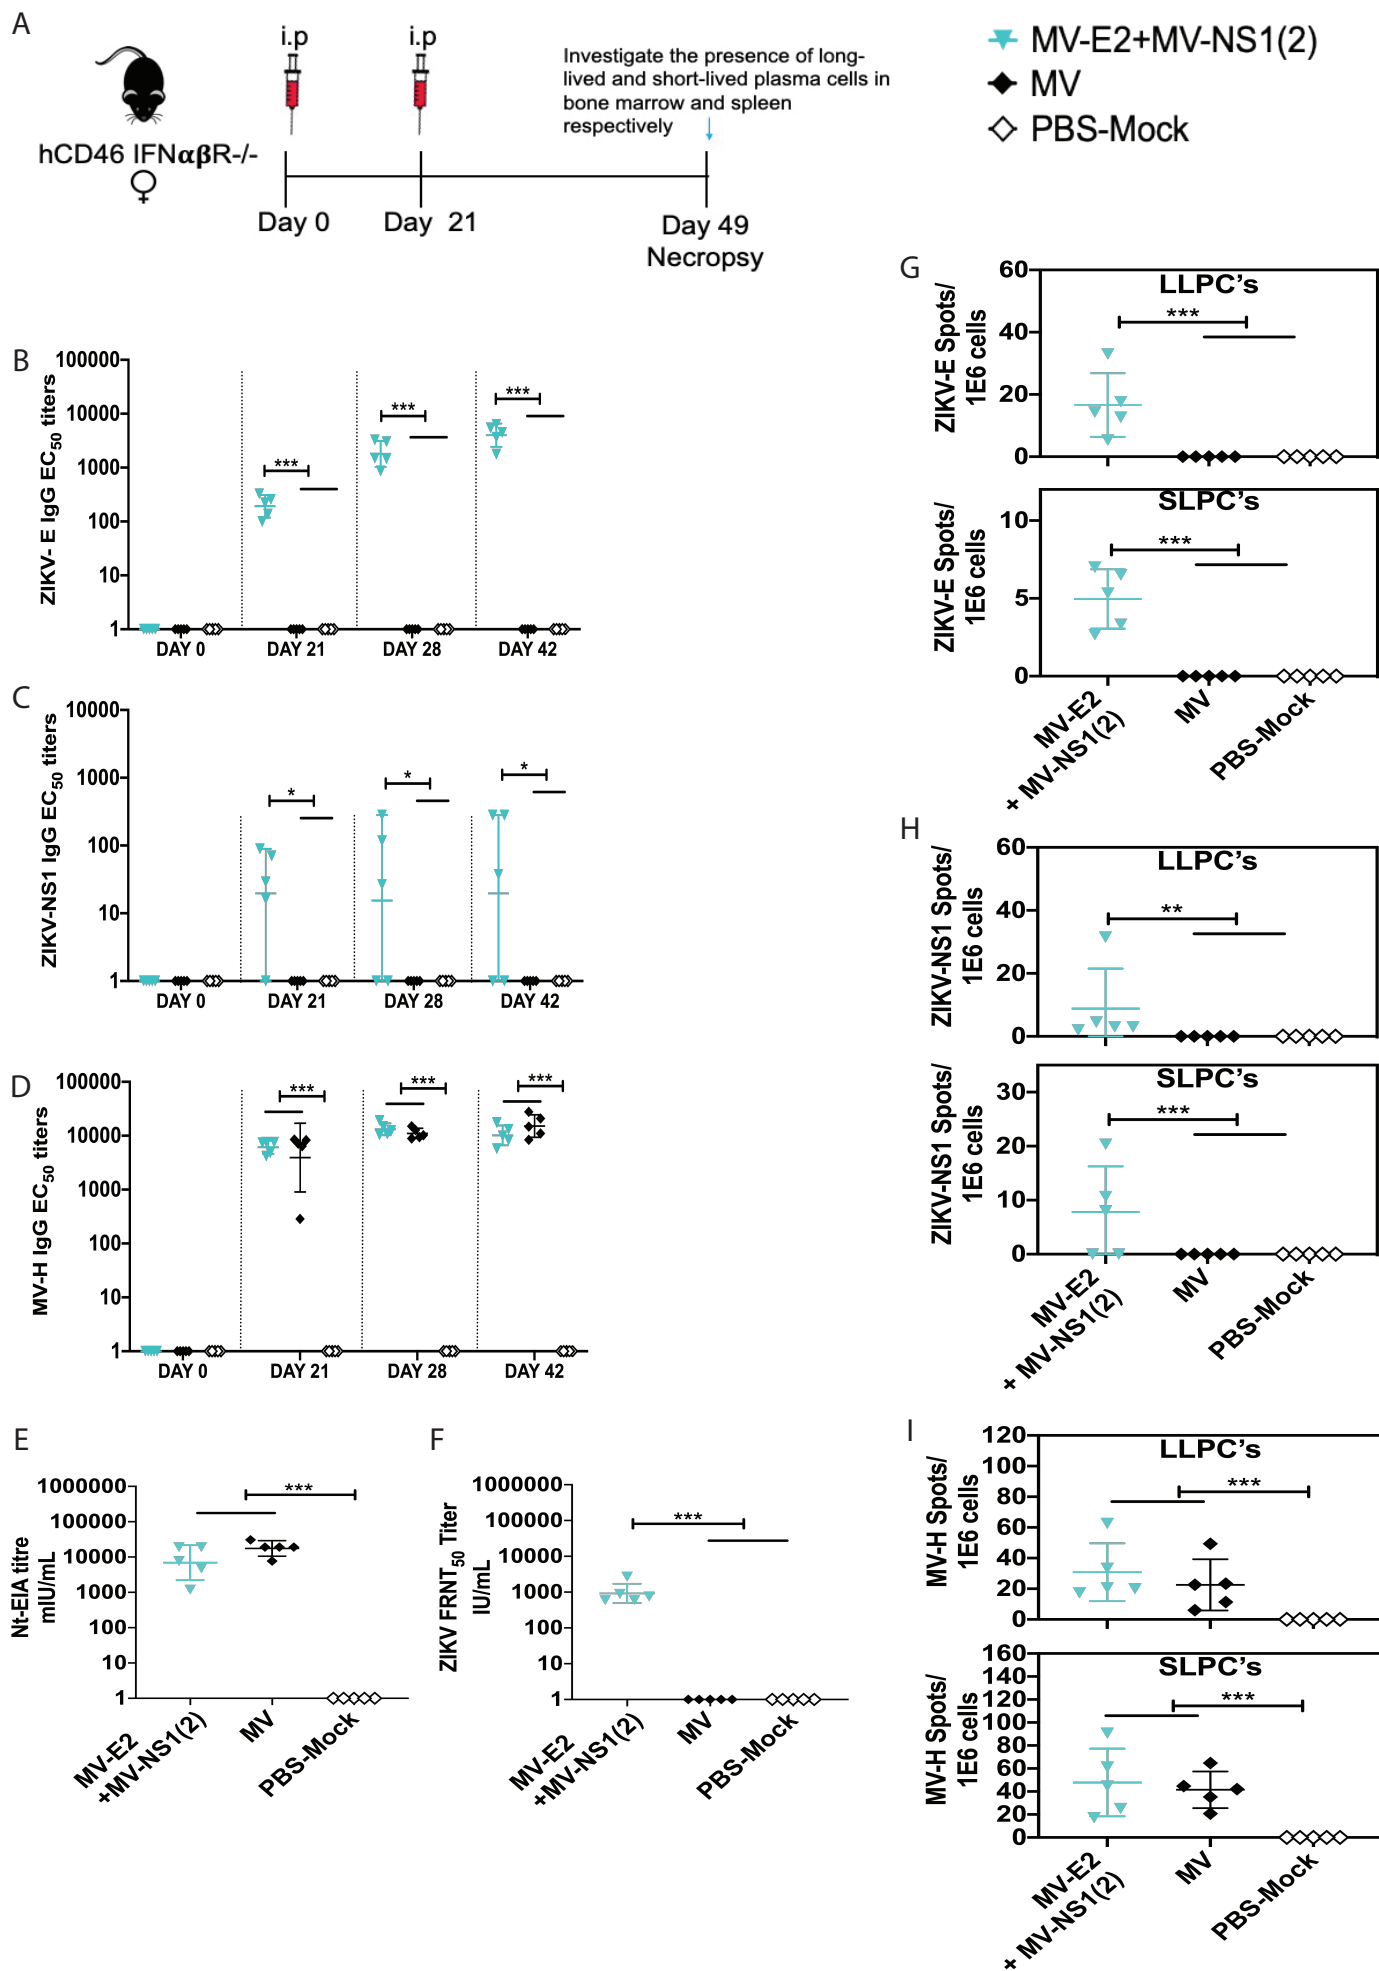

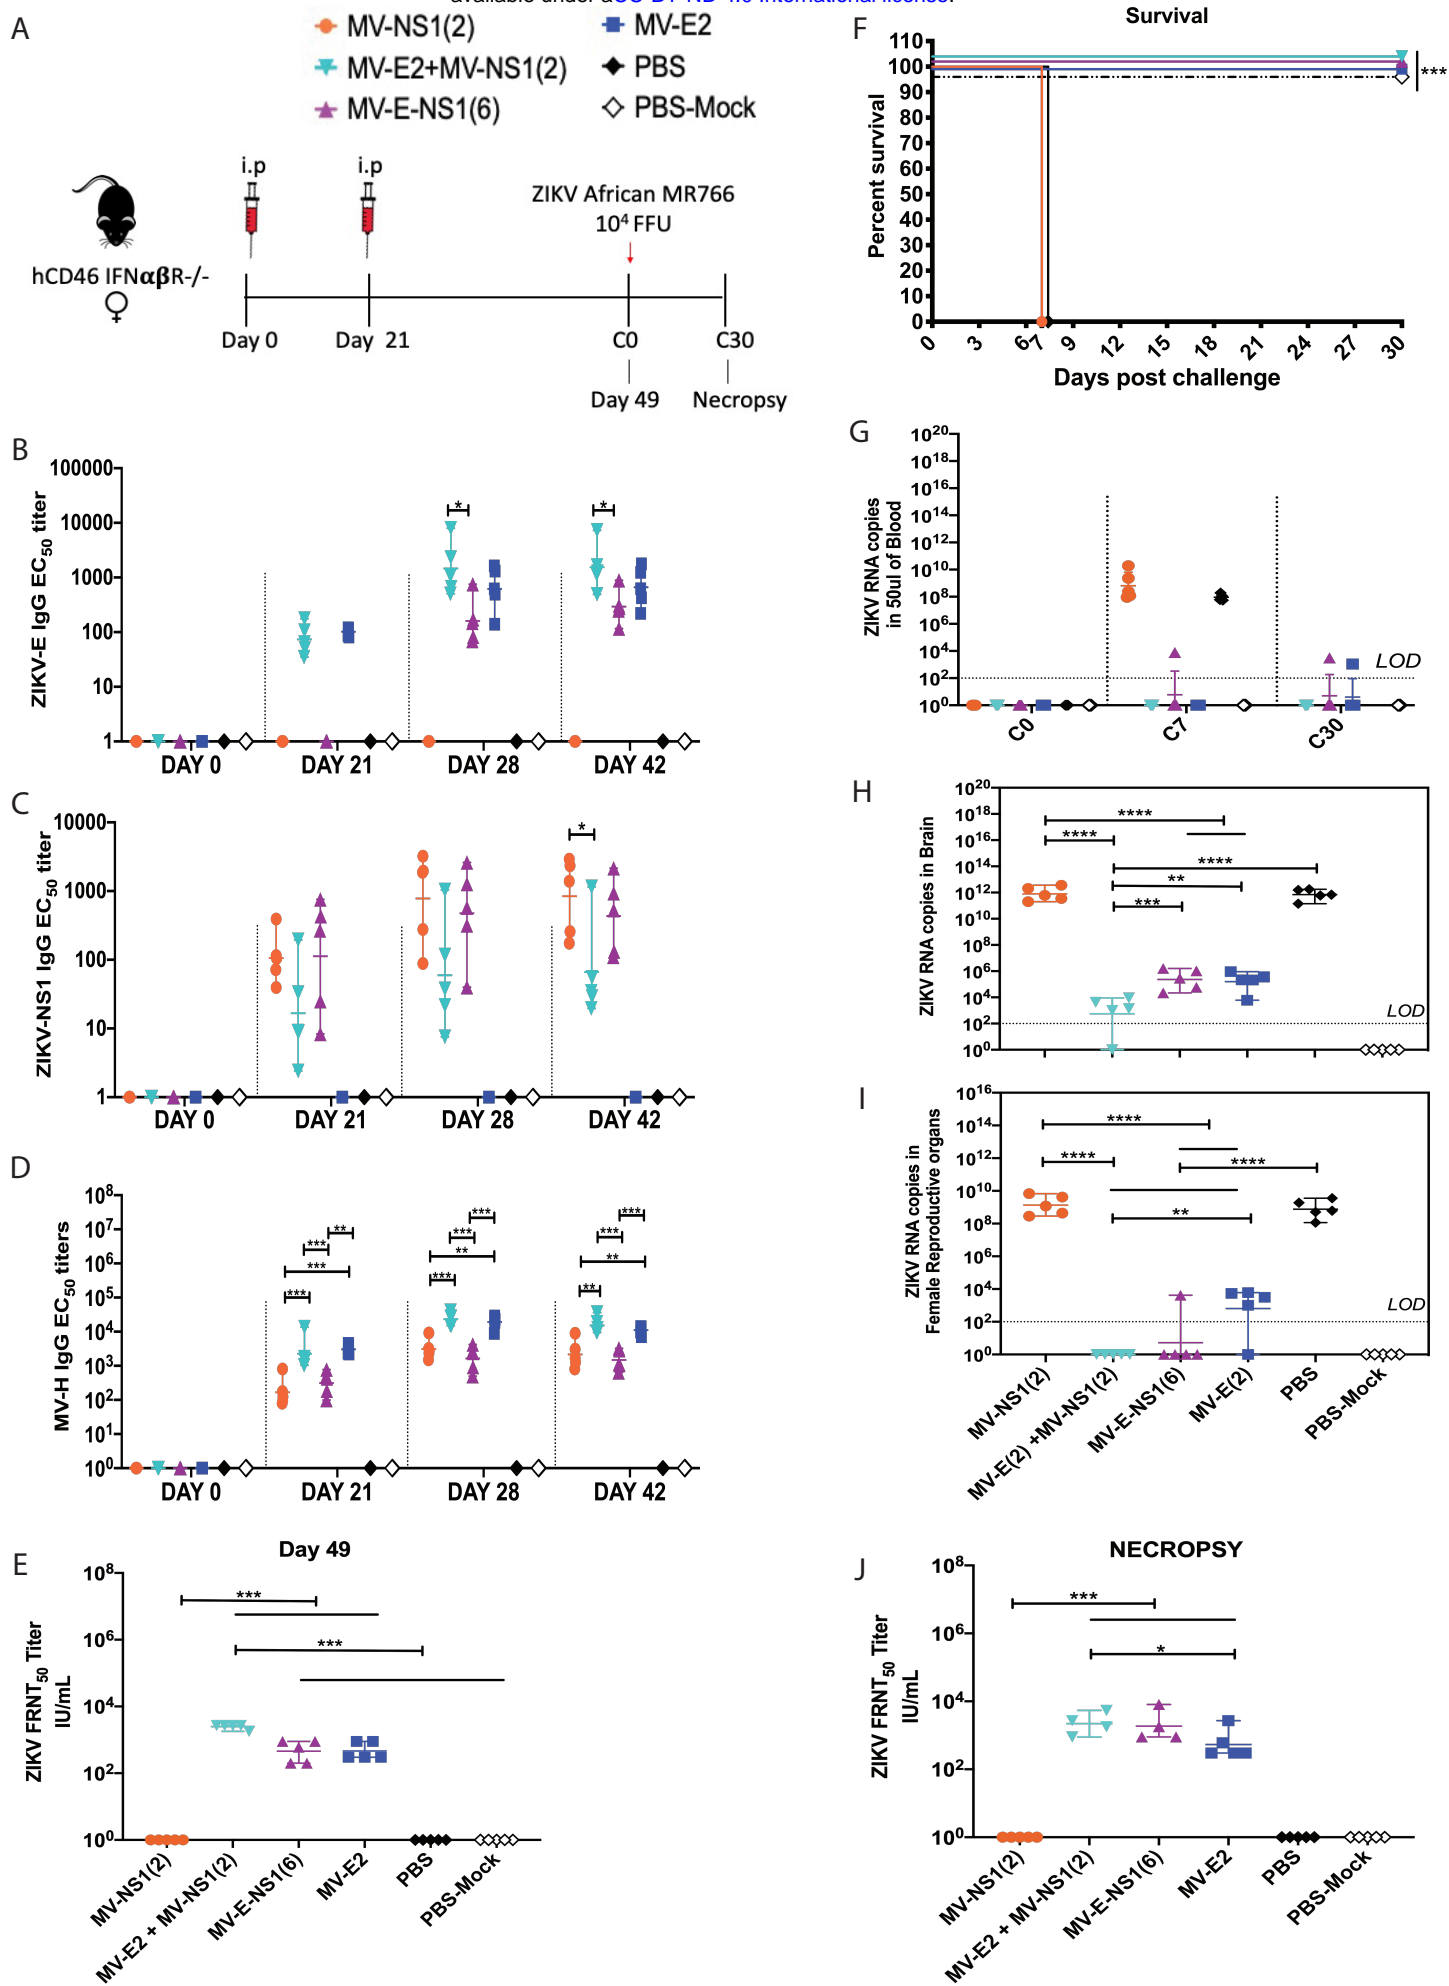

A

codon optimized Zika virus Asian Puerto Rico 2015 strain  
NS1

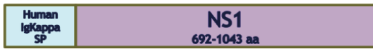

codon optimized Zika virus Asian Puerto Rico 2015 strain  
E-NS1

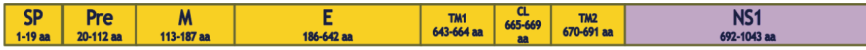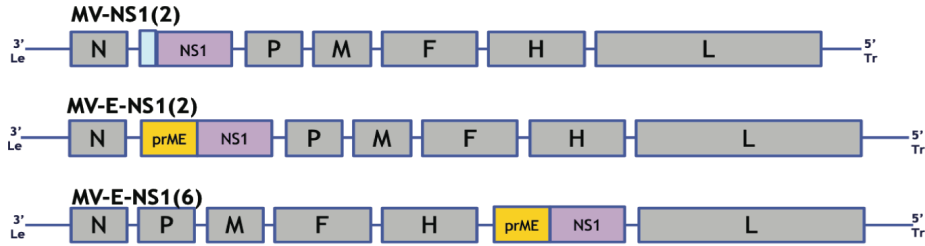

B

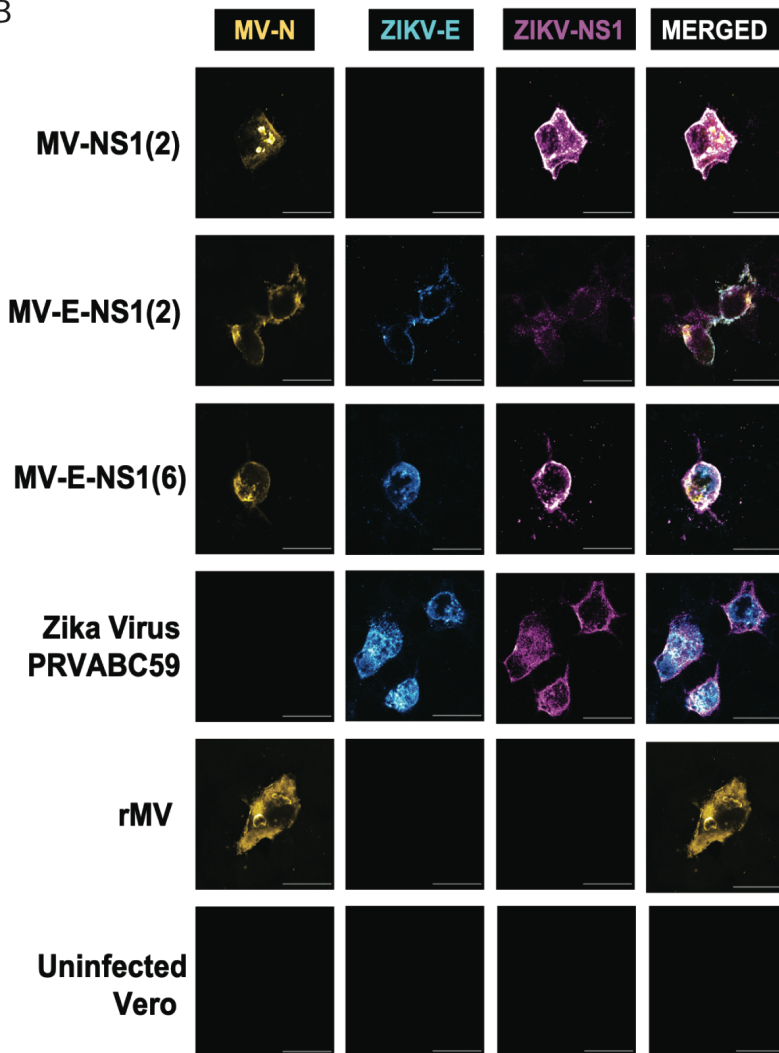

C

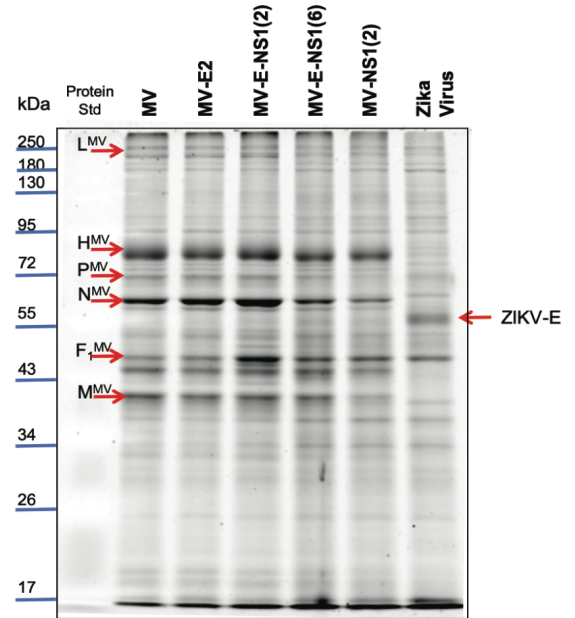

D

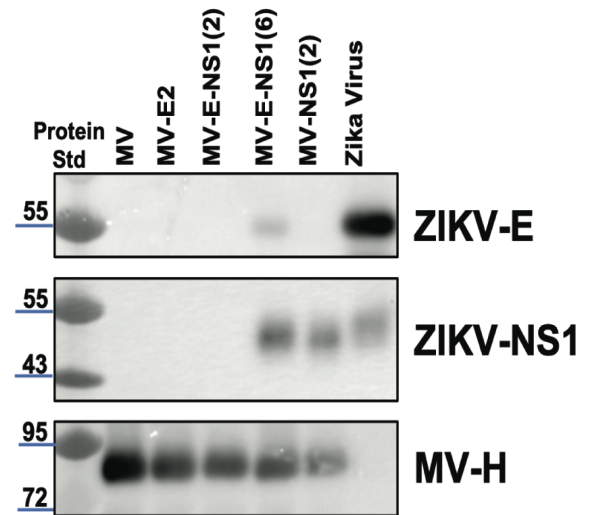

E

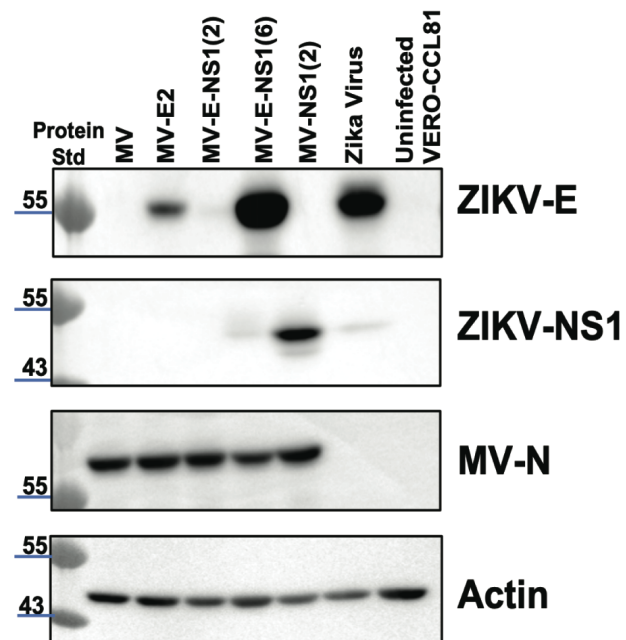

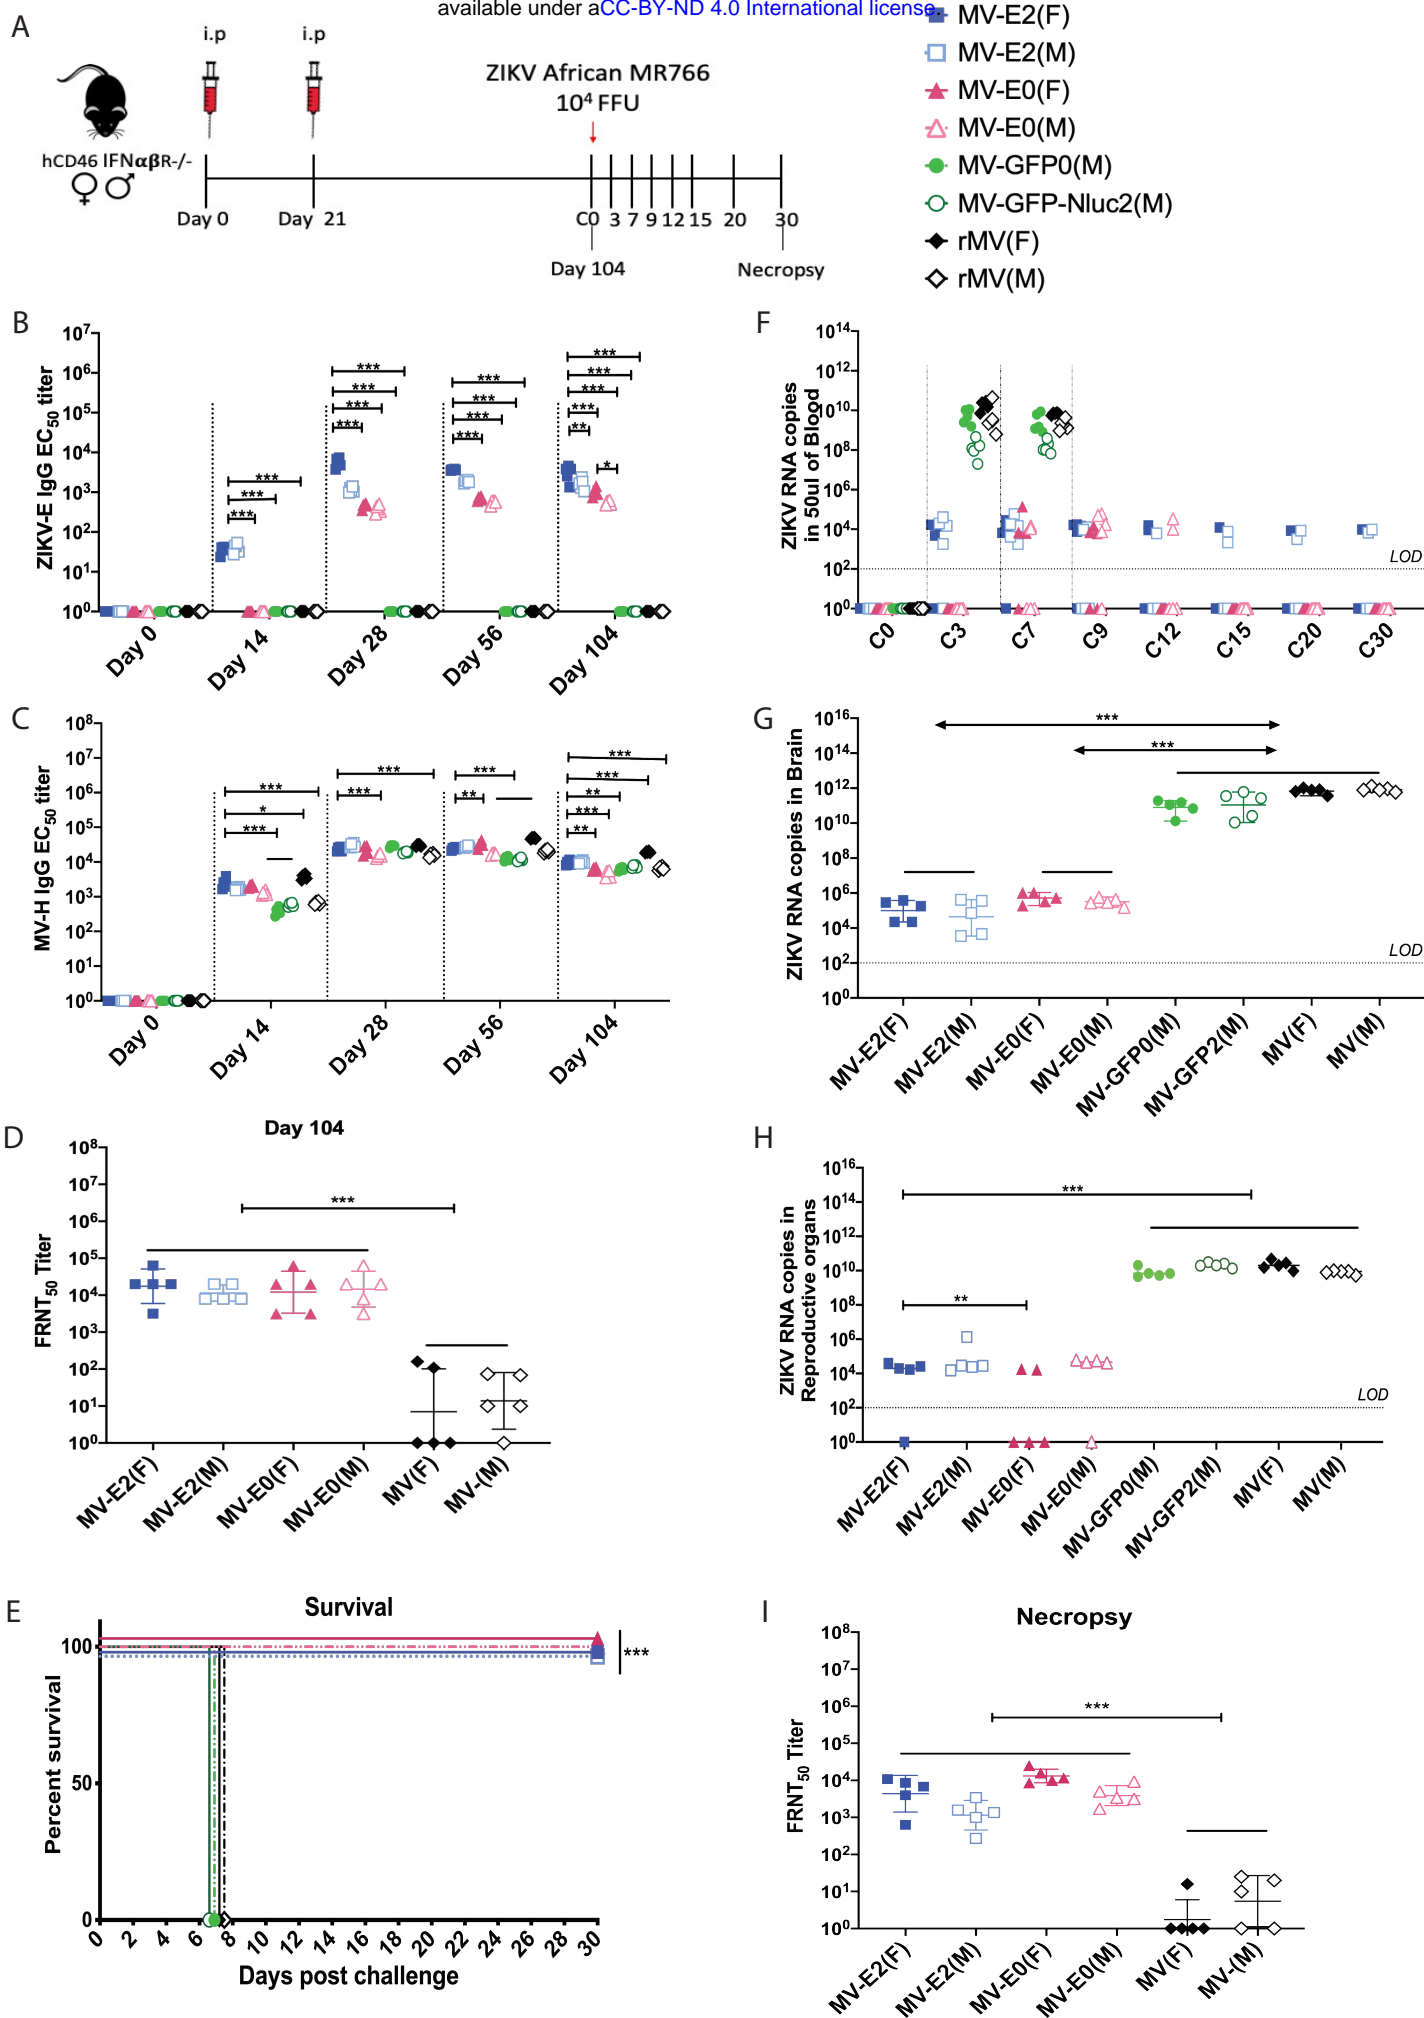



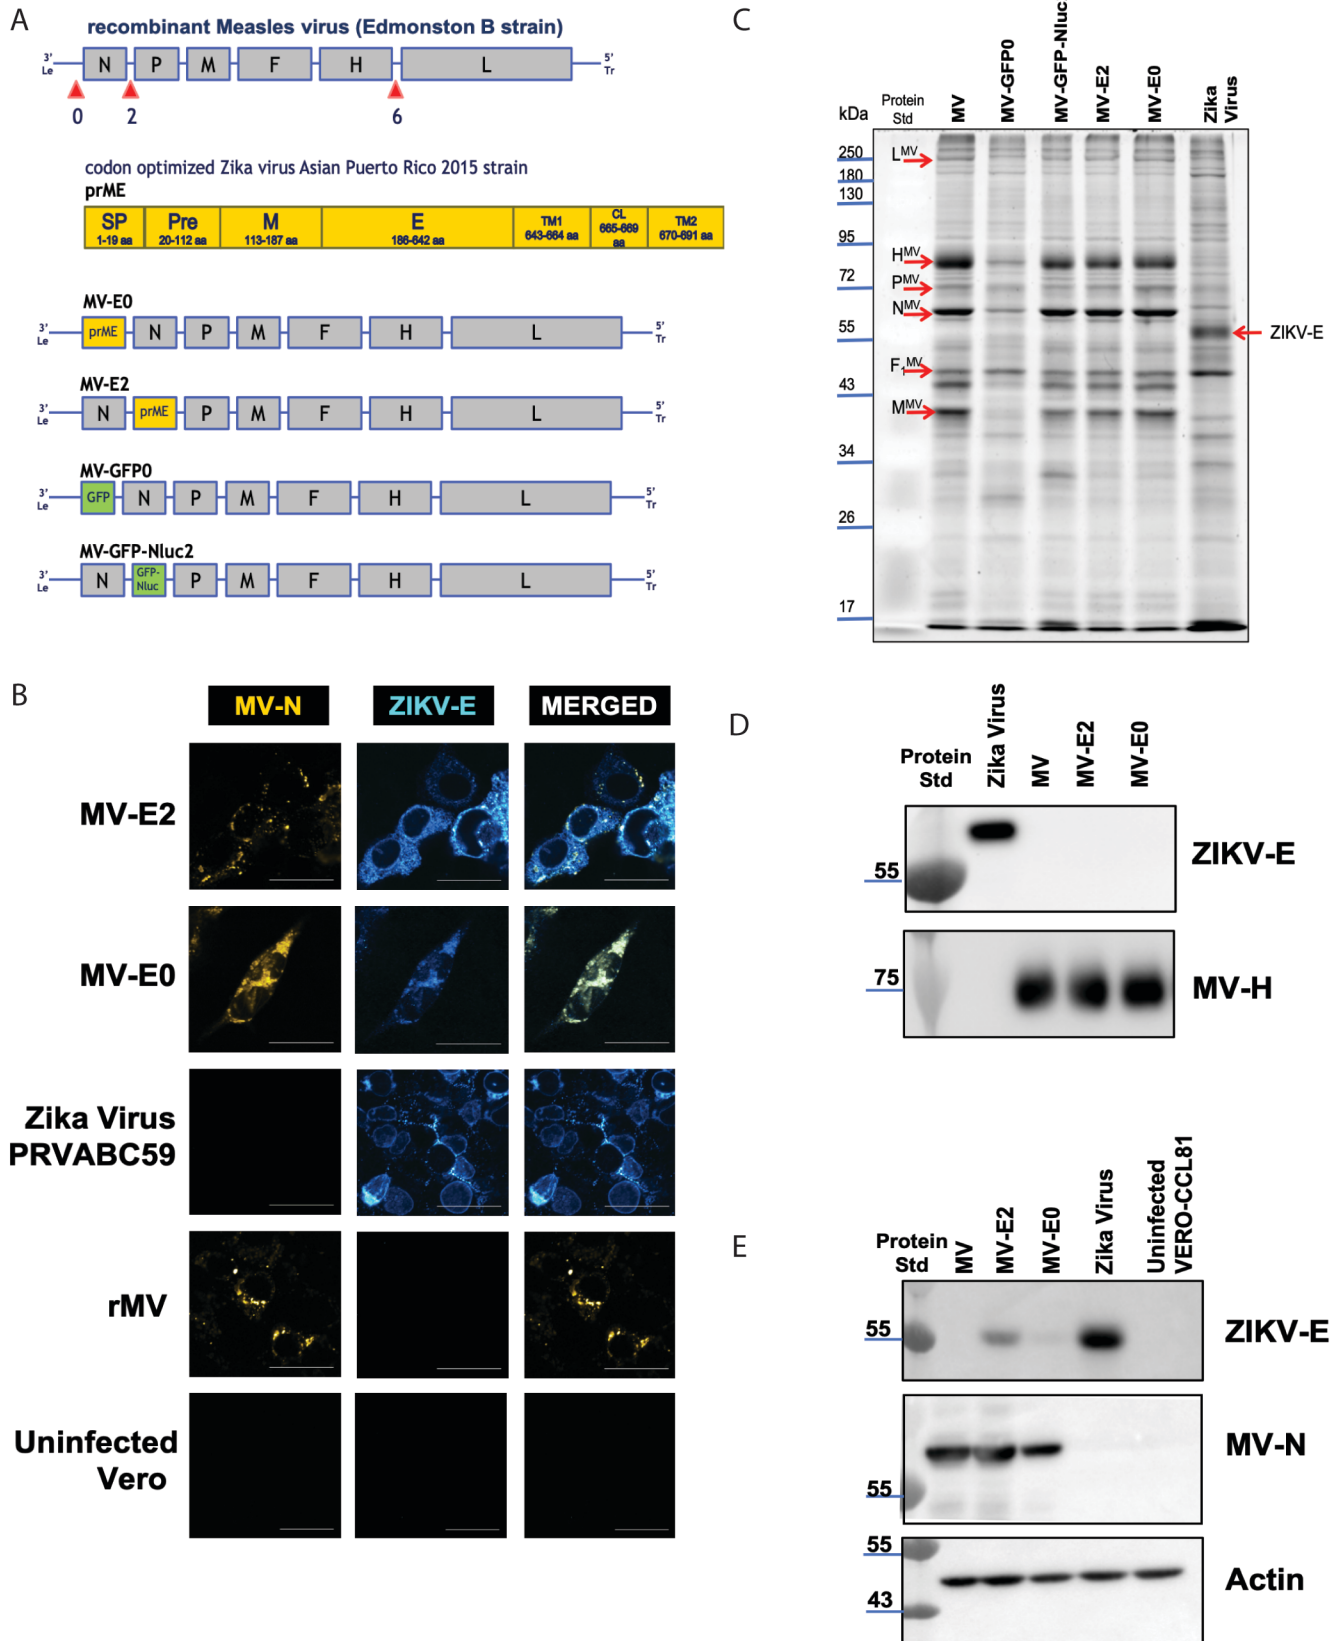

Source: https://www.biorxiv.org/content/10.1101/2020.09.17.301622v1.full.pdf
